# Supplementary material for: Giant worms chez moi! Hammerhead flatworms (Platyhelminthes, Geoplanidae, Bipalium spp., Diversibipalium spp.) in metropolitan France and overseas French territories
Source: PeerJ journal article supplement (doi:10.7717/peerj.4672), 2018-05-22

## Supplement 2 to article: Records from citizen science

### Giant worms *chez moi!* Hammerhead flatworms (Platyhelminthes, Geoplanidae, *Bipalium* spp., *Diversibipalium* spp.) in metropolitan France and overseas French territories

Jean-Lou Justine <sup>1\*</sup>, Leigh Winsor <sup>2</sup>, Delphine Gey <sup>3</sup>, Pierre Gros <sup>4</sup> and Jessica Thévenot <sup>5</sup>

1 Institut Systématique Évolution Biodiversité (ISYEB), Muséum National d'Histoire Naturelle, CNRS, Sorbonne Université, EPHE, 57 rue Cuvier, CP 51, 75005 Paris, France

2 College of Science and Engineering, James Cook University, Townsville, Australia

3 Service de Systématique Moléculaire, Muséum National d'Histoire Naturelle, Paris, France

4 Amateur Naturalist, Cagnes-sur-Mer, France

5 Coordination technique et scientifique de la stratégie nationale relative aux espèces exotiques envahissantes, UMS Patrinat, Muséum National d'Histoire Naturelle, Sorbonne Universités, Paris, France

PeerJ 6 : e4672 (2018)

DOI : [10.7717/peerj.4672](https://doi.org/10.7717/peerj.4672)

## Supplement 2 to article: Records from citizen science

Reports of sighting of land planarians were received from citizens, mainly by email, sometimes by telephone. Photographs and details about locality were solicited, and only reports including this information were considered. Wrong records (slugs, myriapods, earthworms, leeches, caterpillars, nematomorphs, and nemerteans) were eliminated. Information collected from citizen science allowed monitoring of several land planarians (Justine et al. 2014a). Photographs were studied, and species were identified whenever possible. Only information relative to bipaliines is reported in this paper). Sometimes citizens provided records dating from before the survey, such as an amateur movie taken in 1999. Most citizens provided an authorisation to use the photographs at the time of the initial contact by email, and most photographs were posted to the twitter account @Plathelminthe4 <https://twitter.com/Plathelminthe4>.

When we prepared this paper for publication, we sought authorization to use the photographs and to publish them under a Creative Commons Licence; only one of the citizens refused to provide the authorization, but some of them did not respond, probably simply because they changed their emails or did not check them. In these cases, we provide the scientific information about the presence of species, but we do not include the photograph of the worm or the name of the citizen in the paper; these records are marked “consent not obtained”.

# *Bipalium kewense*: Records

## Records of *Bipalium kewense* identified from photographs.

| #   | Date       | Locality            | Department / State   | Country - Continent        | Origin of data                |
|-----|------------|---------------------|----------------------|----------------------------|-------------------------------|
| K01 | 20/08/2017 | Bora Bora           | French Polynesia     | French Polynesia - Oceania | Gerlach, Justin               |
| K02 | 13/10/2010 | Basse-Terre         | Guadeloupe           | Guadeloupe - C. America    | Guezennec, Pierre et Claudine |
| K03 | 22/01/2014 | Unknown             | Guadeloupe           | Guadeloupe - C. America    | Consent not obtained          |
| K04 | 14/01/2007 | Petit-Bourg         | Guadeloupe           | Guadeloupe - C. America    | Lurel, Félix                  |
| K05 | 19/02/2015 | La Trinité          | Martinique           | Martinique - C. America    | Delannoye, Régis              |
| K06 | 19/04/2016 | Saint Joseph        | Martinique           | Martinique - C. America    | Andrebe, Silvio               |
| K07 | 25/08/2017 | Plaine des Cafres   | La Réunion           | La Réunion - Africa        | Pronier, Pascal               |
| K08 | 03/11/2013 | Cagnes-sur-Mer      | Alpes-Maritimes      | Met. France - Europe       | Gros, Pierre                  |
| K09 | 19/01/2014 | Cagnes-sur-Mer      | Alpes-Maritimes      | Met. France - Europe       | Gros, Pierre                  |
| K10 | 05/11/2014 | Cagnes-sur-Mer      | Alpes-Maritimes      | Met. France - Europe       | Gros, Pierre                  |
| K11 | 16/10/2013 | Beaulieu-sur-Mer    | Alpes-Maritimes      | Met. France - Europe       | Pelcer, Jean-Paul             |
| K12 | 21/07/2014 | Nice                | Alpes-Maritimes      | Met. France - Europe       | Gerriet, Olivier *            |
| K13 | 15/10/2014 | Appietto            | Corse-Sud (Corsica)  | Met. France - Europe       | Consent not obtained          |
| K14 | 17/10/2013 | Pietrosella         | Corse-Sud (Corsica)  | Met. France - Europe       | Senee, Patrick                |
| K15 | 23/08/2014 | Arcachon            | Gironde              | Met. France - Europe       | Consent not obtained          |
| K16 | 21/11/2002 | Saint-Jean-de-Vedas | Hérault              | Met. France - Europe       | Peaucellier, Gérard           |
| K17 | 27/10/2014 | Biscarosse          | Landes               | Met. France - Europe       | Consent not obtained          |
| K18 | 27/09/2008 | Hagetmau            | Landes               | Met. France - Europe       | Jeannotin, Josette            |
| K19 | 22/09/2016 | Nantes              | Loire-Atlantique     | Met. France - Europe       | Consent not obtained          |
| K20 | 16/10/2014 | Grimaud             | Var                  | Met. France - Europe       | Bernez, Alain                 |
| K21 | 01/08/2014 | Toulon              | Var                  | Met. France - Europe       | Consent not obtained          |
| K22 | 29/07/2014 | Sens (Hothouse)     | Yonne                | Met. France - Europe       | Burel, Jonathan **            |
| K23 | 23/10/2017 | Peyrouse            | Hautes-Pyrénées      | Met. France - Europe       | Tremosa, Clémence             |
| K24 | 17/12/2014 | Arthez de Béarn     | Pyrénées-Atlantiques | Met. France - Europe       | Sillard, Dominique            |
| K25 | 17/09/2017 | Billère             | Pyrénées-Atlantiques | Met. France - Europe       | Rolland, Geneviève            |
| K26 | 28/01/2018 | Billère             | Pyrénées-Atlantiques | Met. France - Europe       | Rolland, Geneviève            |
| K27 | 20/09/2014 | Bayonne             | Pyrénées-Atlantiques | Met. France - Europe       | Bonnefous, François           |
| K28 | 18/08/2014 | Hasparren           | Pyrénées-Atlantiques | Met. France - Europe       | Voise, Mireille               |
| K29 | 22/04/2016 | Jurançon (near)     | Pyrénées-Atlantiques | Met. France - Europe       | Pauchet, Marjolaine           |
| K30 | 29/04/2016 | Nay                 | Pyrénées-Atlantiques | Met. France - Europe       | Lamaille, Corinne             |
| K31 | 28/09/2014 | Orthez              | Pyrénées-Atlantiques | Met. France - Europe       | Rougeux, Christian            |
| K32 | 22/08/2016 | Saint Jean de Luz   | Pyrénées-Atlantiques | Met. France - Europe       | Centelles, Ruben              |
| K33 | 01/01/1999 | Urcuit              | Pyrénées-Atlantiques | Met. France - Europe       | Esposito, Mario               |
| K34 | 14/09/2014 | Urt                 | Pyrénées-Atlantiques | Met. France - Europe       | Chanderot, Vincent            |
| K35 | 12/08/2017 | Ustaritz            | Pyrénées-Atlantiques | Met. France - Europe       | Lescourret, Monique & Bernard |
| K36 | 14/09/2014 | Villefranque        | Pyrénées-Atlantiques | Met. France - Europe       | Consent not obtained          |

\* Muséum d'Histoire Naturelle, Nice, France; \*\*, FREDON.

## *Bipalium kewense* K01

| #   | Date       | Locality  | Department / State | Country - Continent        | Origin of data  |
|-----|------------|-----------|--------------------|----------------------------|-----------------|
| K01 | 20/08/2017 | Bora Bora | French Polynesia   | French Polynesia - Oceania | Gerlach, Justin |

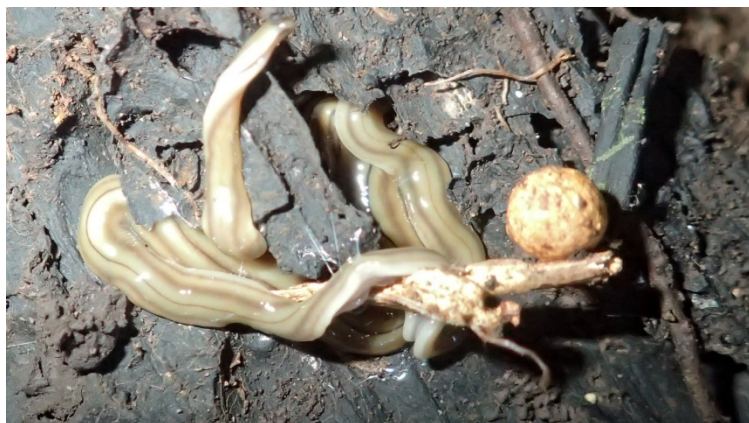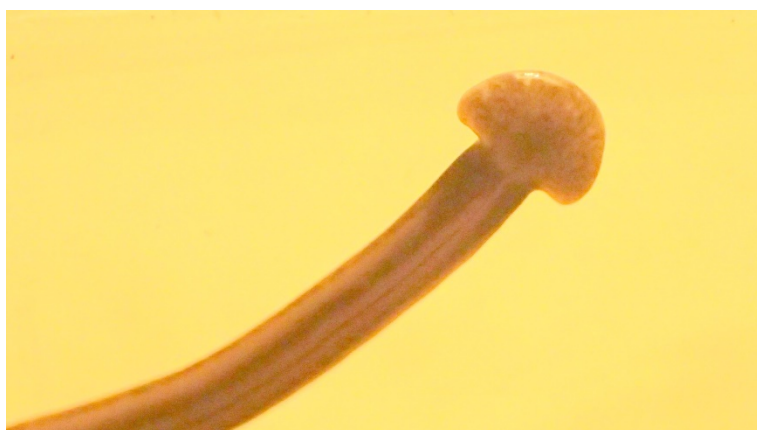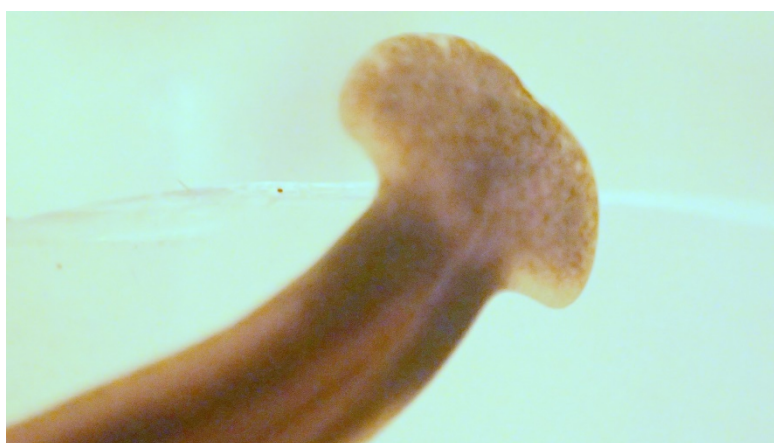

## *Bipalium kewense* K02

| #   | Date       | Locality    | Department / State | Country - Continent     | Origin of data                |
|-----|------------|-------------|--------------------|-------------------------|-------------------------------|
| K02 | 13/10/2010 | Basse-Terre | Guadeloupe         | Guadeloupe - C. America | Guezennec, Pierre et Claudine |

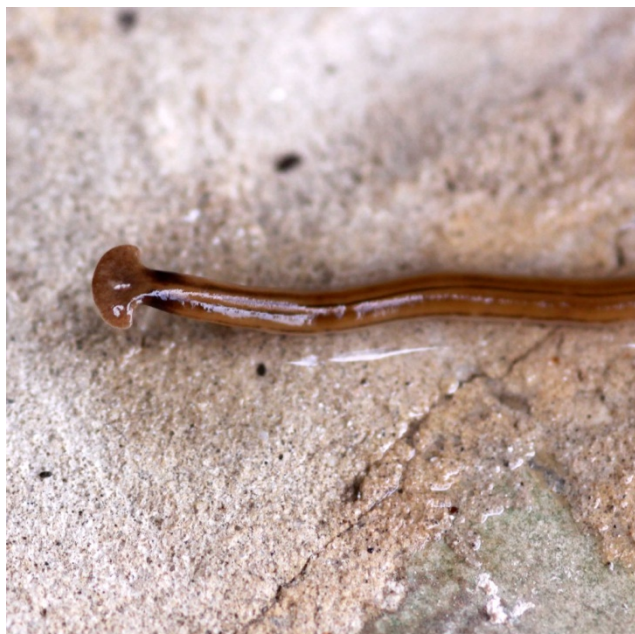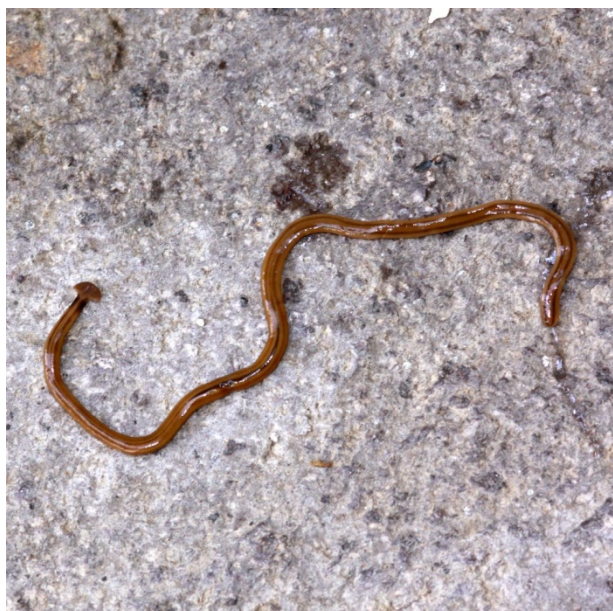

## *Bipalium kewense* K03

| #   | Date       | Locality | Department / State | Country - Continent     | Origin of data       |
|-----|------------|----------|--------------------|-------------------------|----------------------|
| K03 | 22/01/2014 | Unknown  | Guadeloupe         | Guadeloupe - C. America | Consent not obtained |

## *Bipalium kewense* K04

| #   | Date       | Locality    | Department / State | Country - Continent     | Origin of data |
|-----|------------|-------------|--------------------|-------------------------|----------------|
| K04 | 14/01/2007 | Petit-Bourg | Guadeloupe         | Guadeloupe - C. America | Lurel, Félix   |

Note: length of animal = ca. 13 cm

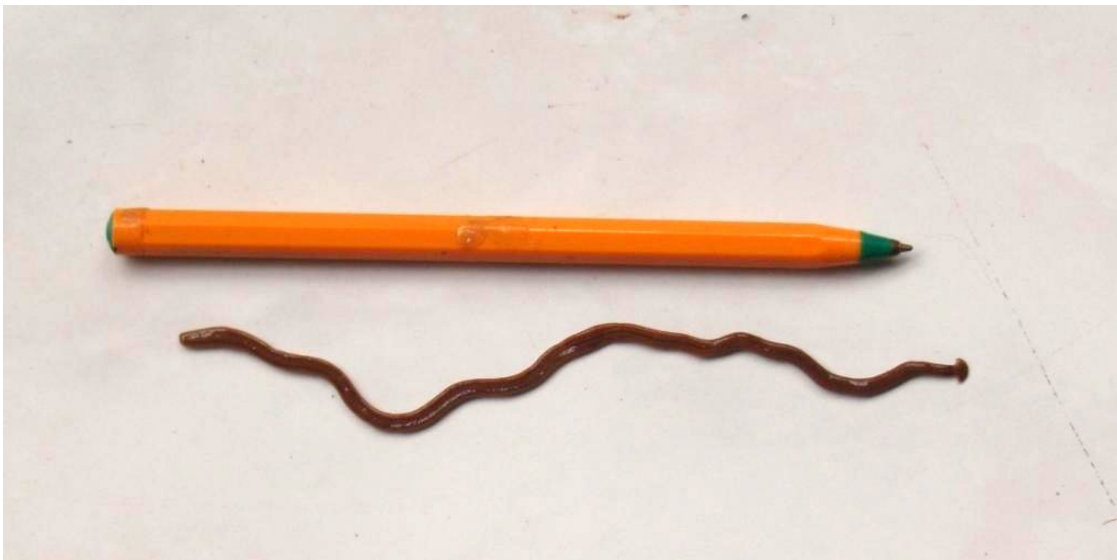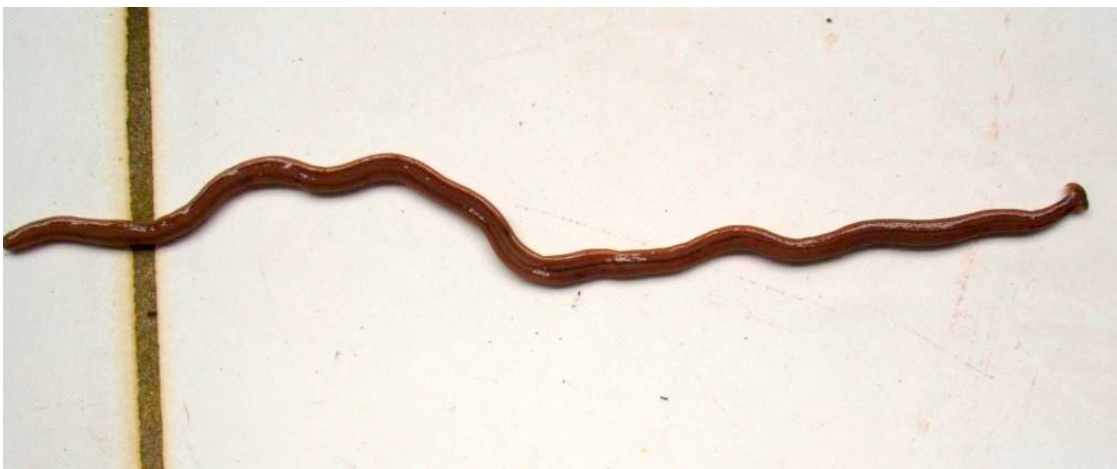

## *Bipalium kewense* K05

| #   | Date       | Locality   | Department / State | Country - Continent     | Origin of data   |
|-----|------------|------------|--------------------|-------------------------|------------------|
| K05 | 19/02/2015 | La Trinité | Martinique         | Martinique - C. America | Delannoye, Régis |

Note: length of animal = 20 cm

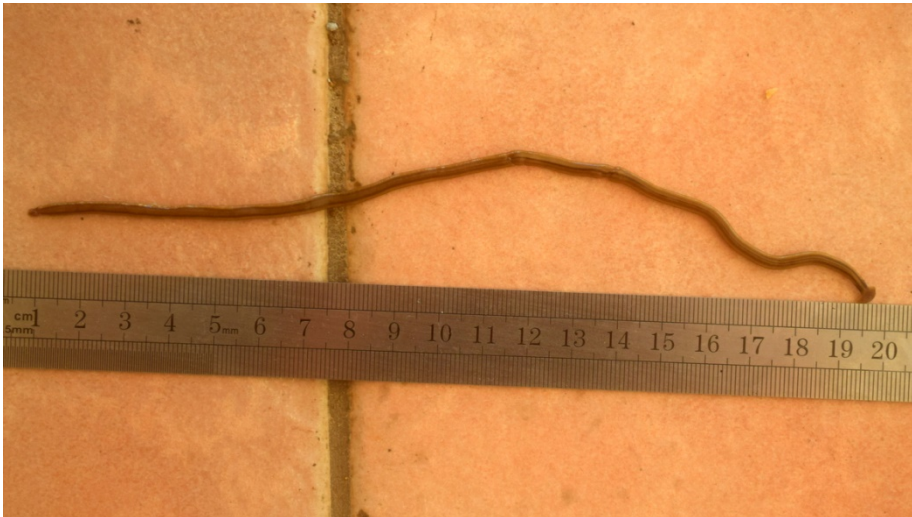

## *Bipalium kewense* K06

| #   | Date       | Locality     | Department / State | Country - Continent     | Origin of data  |
|-----|------------|--------------|--------------------|-------------------------|-----------------|
| K06 | 19/04/2016 | Saint Joseph | Martinique         | Martinique - C. America | Andrebe, Silvio |

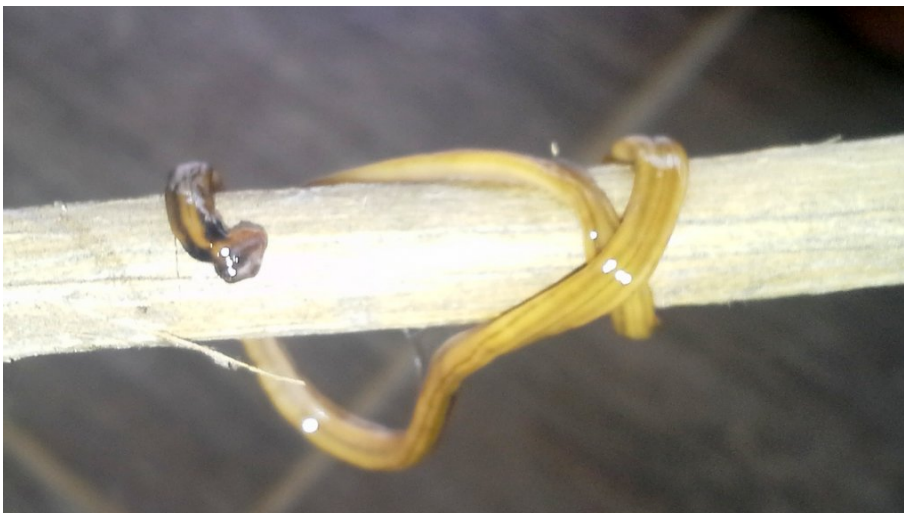

## *Bipalium kewense* K07

| #   | Date       | Locality          | Department / State | Country - Continent | Origin of data  |
|-----|------------|-------------------|--------------------|---------------------|-----------------|
| K07 | 25/08/2017 | Plaine des Cafres | La Réunion         | La Réunion - Africa | Pronier, Pascal |

Note: length of animal = 10 cm

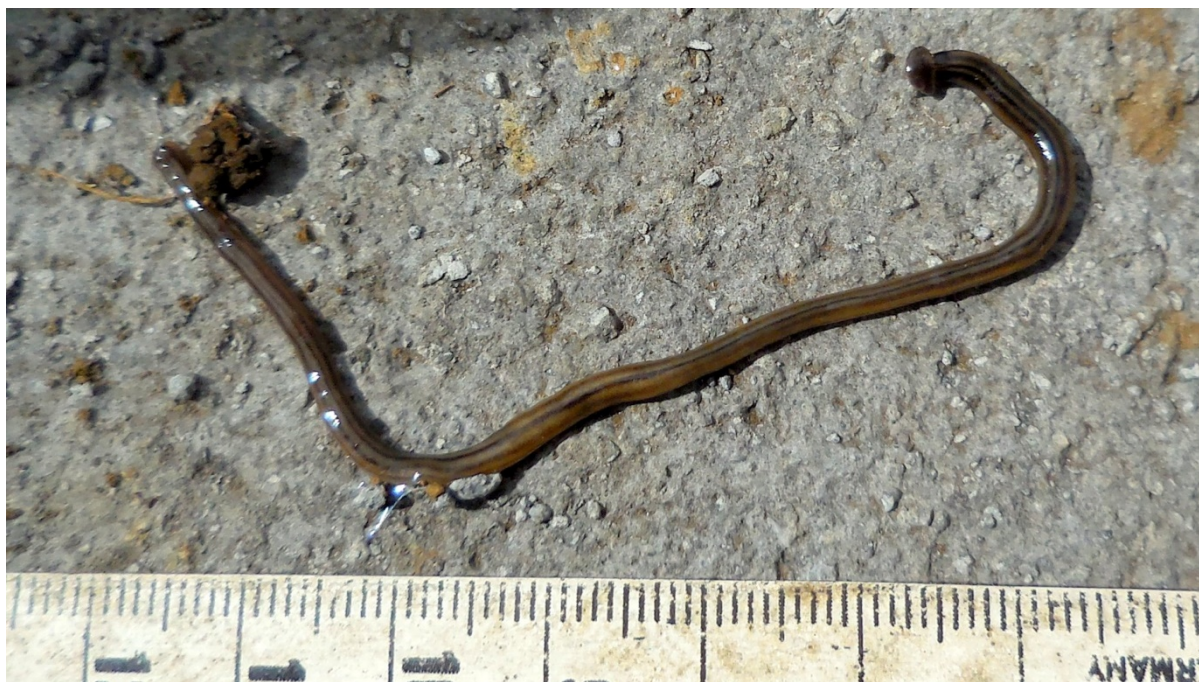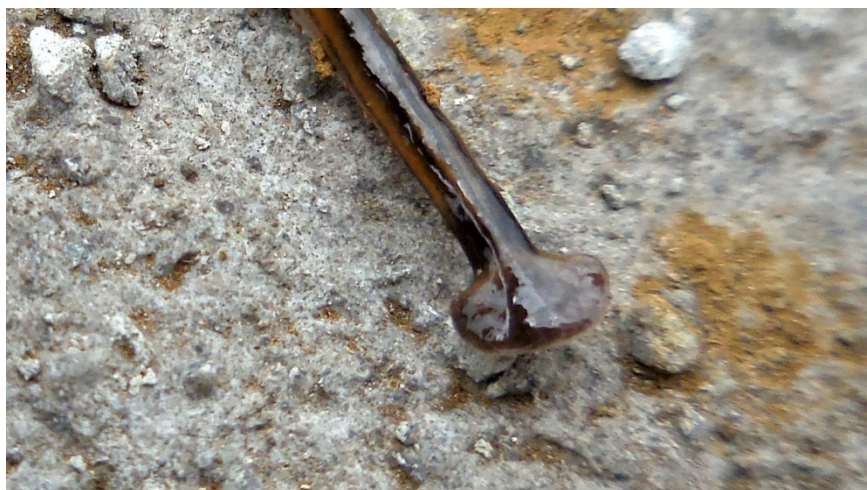



## *Bipalium kewense* K08-K10

| #   | Date       | Locality       | Department / State | Country - Continent  | Origin of data |
|-----|------------|----------------|--------------------|----------------------|----------------|
| K08 | 03/11/2013 | Cagnes-sur-Mer | Alpes-Maritimes    | Met. France - Europe | Gros, Pierre   |
| K09 | 19/01/2014 | Cagnes-sur-Mer | Alpes-Maritimes    | Met. France - Europe | Gros, Pierre   |
| K10 | 05/11/2014 | Cagnes-sur-Mer | Alpes-Maritimes    | Met. France - Europe | Gros, Pierre   |

The records are illustrated with figures in the text.

## *Bipalium kewense* K11

| #   | Date       | Locality         | Department / State | Country - Continent  | Origin of data    |
|-----|------------|------------------|--------------------|----------------------|-------------------|
| K11 | 16/10/2013 | Beaulieu-sur-Mer | Alpes-Maritimes    | Met. France - Europe | Pelcer, Jean-Paul |

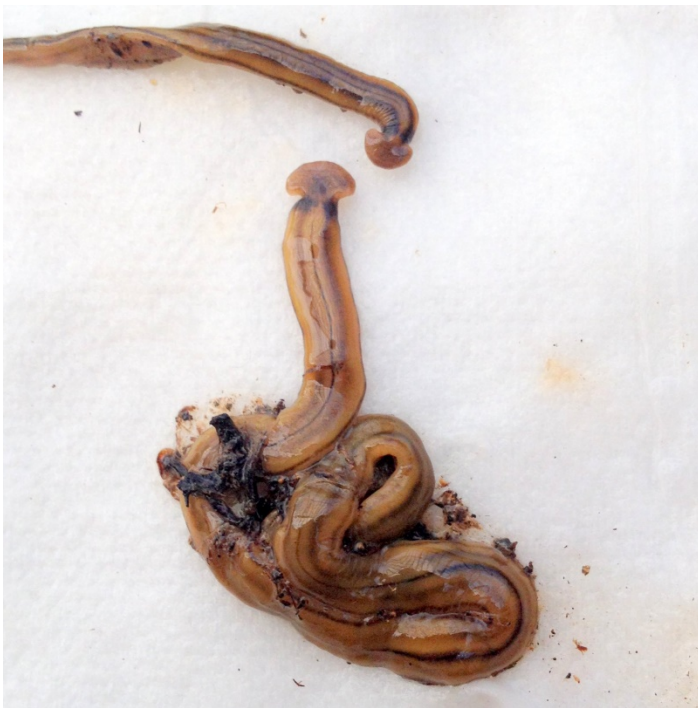

## *Bipalium kewense* K12

| #   | Date       | Locality | Department / State | Country - Continent  | Origin of data     |
|-----|------------|----------|--------------------|----------------------|--------------------|
| K12 | 21/07/2014 | Nice     | Alpes-Maritimes    | Met. France - Europe | Gerriet, Olivier * |

Note : several individuals in public gardens in Nice.

Specimens kept in Muséum d'Histoire Naturelle, Nice, France.

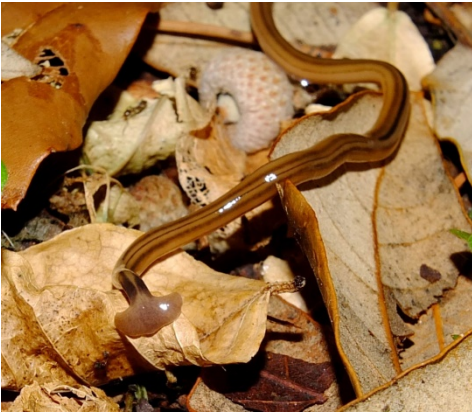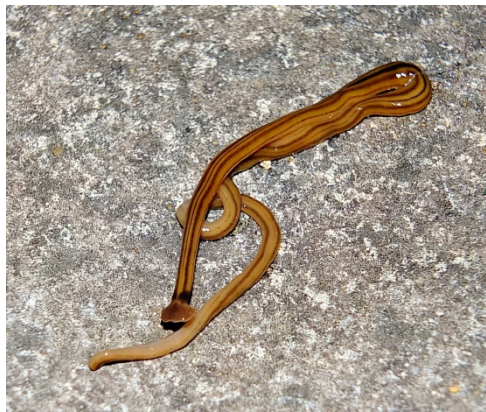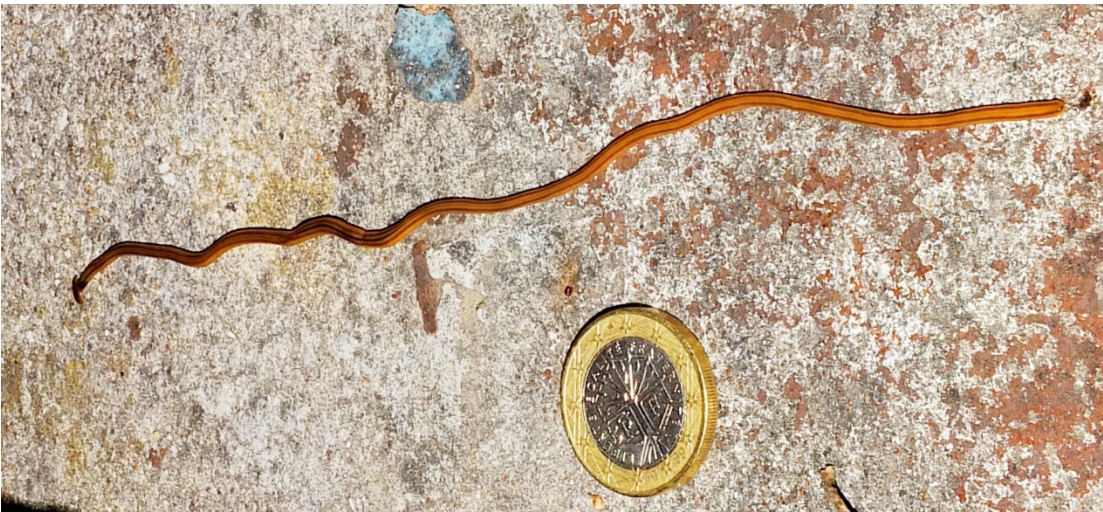

Note: the diameter of the 1€ coin is 23.25 mm

## *Bipalium kewense* K13

| #   | Date       | Locality | Department / State  | Country - Continent  | Origin of data       |
|-----|------------|----------|---------------------|----------------------|----------------------|
| K13 | 15/10/2014 | Appietto | Corse-Sud (Corsica) | Met. France - Europe | Consent not obtained |

## *Bipalium kewense* K14

| #   | Date       | Locality    | Department / State  | Country - Continent  | Origin of data |
|-----|------------|-------------|---------------------|----------------------|----------------|
| K14 | 17/10/2013 | Pietrosella | Corse-Sud (Corsica) | Met. France - Europe | Senee, Patrick |

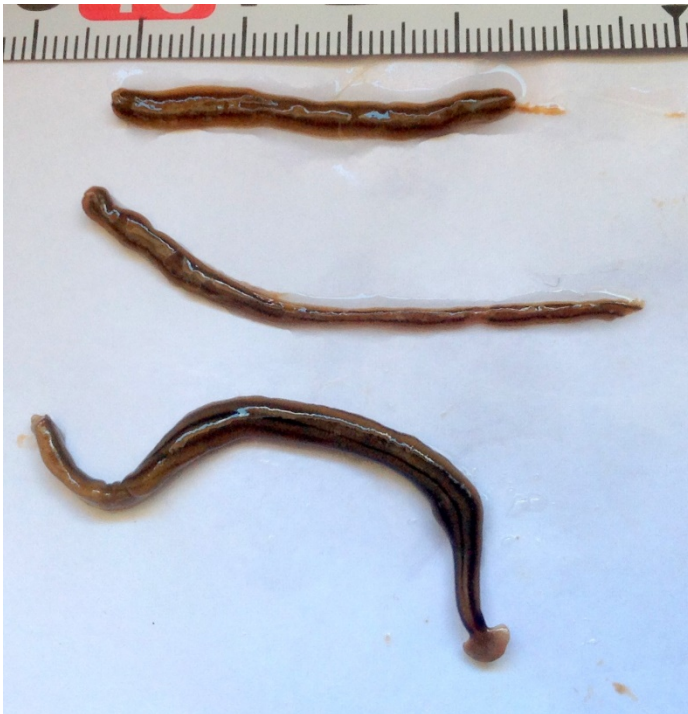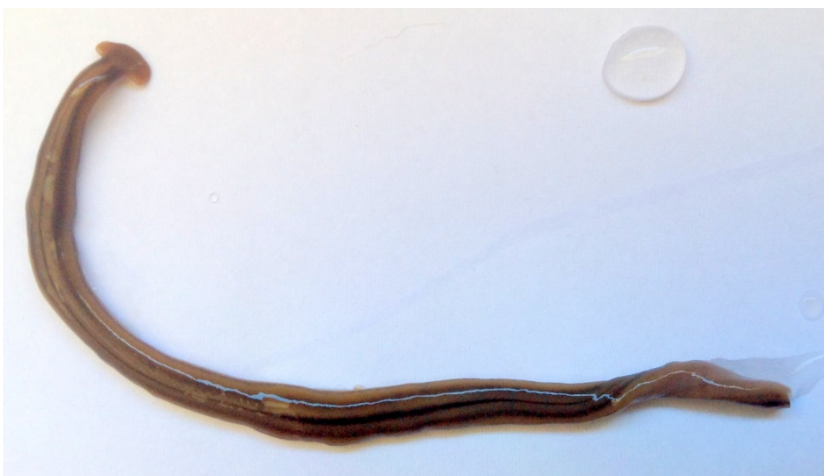

## *Bipalium kewense* K15

| #   | Date       | Locality | Department / State | Country - Continent  | Origin of data       |
|-----|------------|----------|--------------------|----------------------|----------------------|
| K15 | 23/08/2014 | Arcachon | Gironde            | Met. France - Europe | Consent not obtained |

## *Bipalium kewense* K16

| #   | Date       | Locality            | Department / State | Country - Continent  | Origin of data      |
|-----|------------|---------------------|--------------------|----------------------|---------------------|
| K16 | 21/11/2002 | Saint-Jean-de-Vedas | Hérault            | Met. France - Europe | Peaucellier, Gérard |

Note: early record (2002).

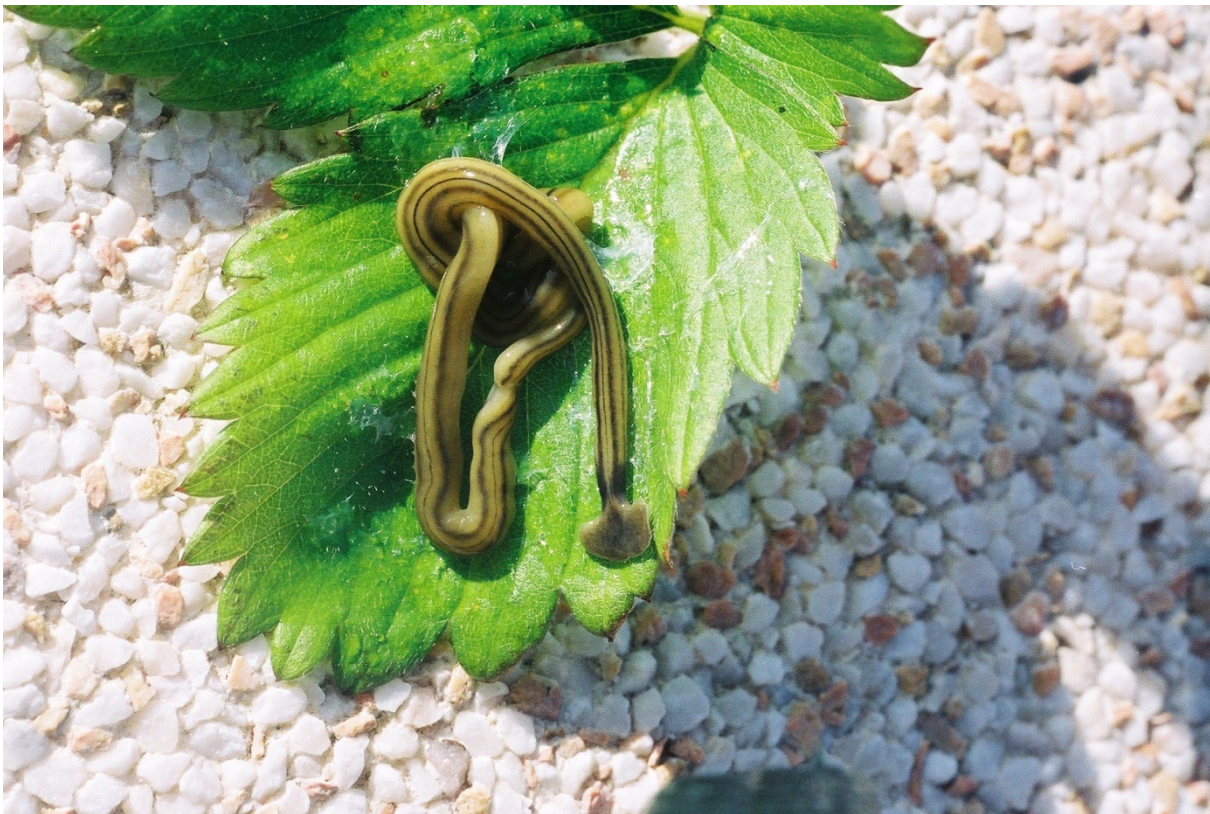

## *Bipalium kewense* K17

| #   | Date       | Locality   | Department / State | Country - Continent  | Origin of data       |
|-----|------------|------------|--------------------|----------------------|----------------------|
| K17 | 27/10/2014 | Biscarosse | Landes             | Met. France - Europe | Consent not obtained |

## *Bipalium kewense* K18

| #   | Date       | Locality | Department / State | Country - Continent  | Origin of data     |
|-----|------------|----------|--------------------|----------------------|--------------------|
| K18 | 27/09/2008 | Hagetmau | Landes             | Met. France - Europe | Jeannotin, Josette |

Note: early record (2008).

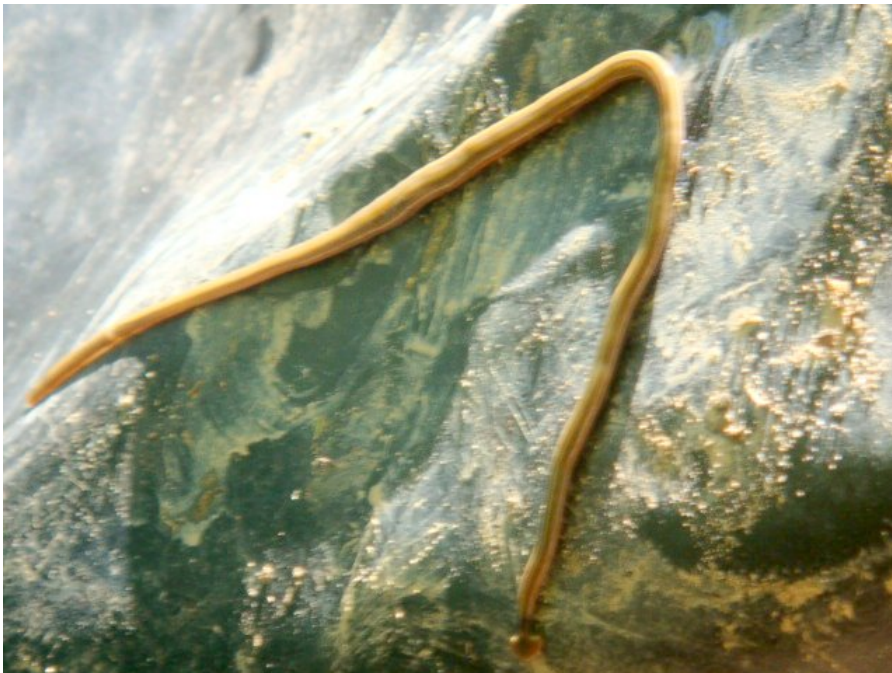

## *Bipalium kewense* K19

| #   | Date       | Locality | Department / State | Country - Continent  | Origin of data       |
|-----|------------|----------|--------------------|----------------------|----------------------|
| K19 | 22/09/2016 | Nantes   | Loire-Atlantique   | Met. France - Europe | Consent not obtained |

## *Bipalium kewense* K20

| #   | Date       | Locality | Department / State | Country - Continent  | Origin of data |
|-----|------------|----------|--------------------|----------------------|----------------|
| K20 | 16/10/2014 | Grimaud  | Var                | Met. France - Europe | Bernez, Alain  |

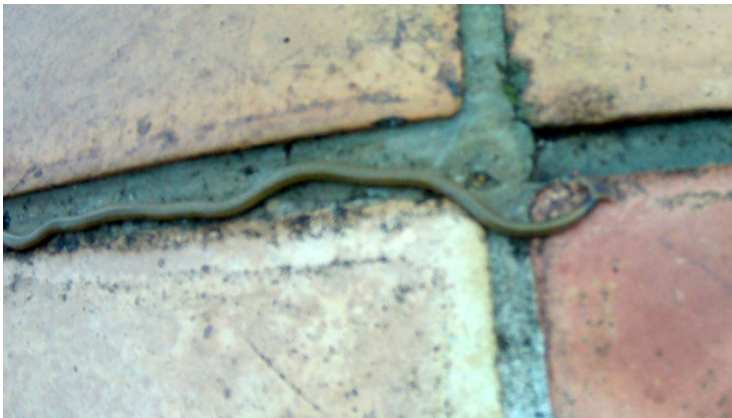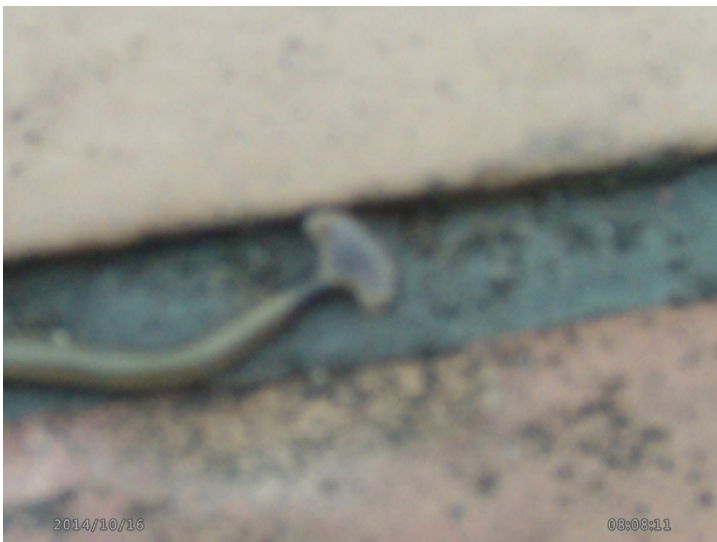

## *Bipalium kewense* K21

| #   | Date       | Locality | Department / State | Country - Continent  | Origin of data       |
|-----|------------|----------|--------------------|----------------------|----------------------|
| K21 | 01/08/2014 | Toulon   | Var                | Met. France - Europe | Consent not obtained |

## *Bipalium kewense* K22

| #   | Date       | Locality        | Department / State | Country - Continent  | Origin of data     |
|-----|------------|-----------------|--------------------|----------------------|--------------------|
| K22 | 29/07/2014 | Sens (Hothouse) | Yonne              | Met. France - Europe | Burel, Jonathan ** |

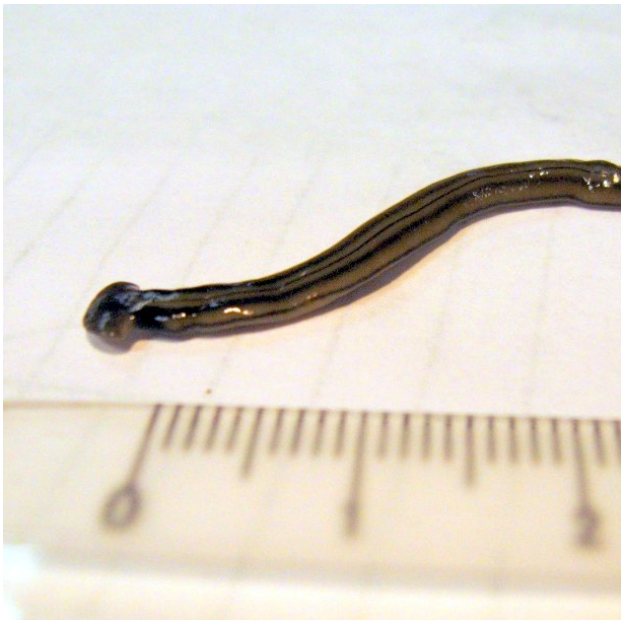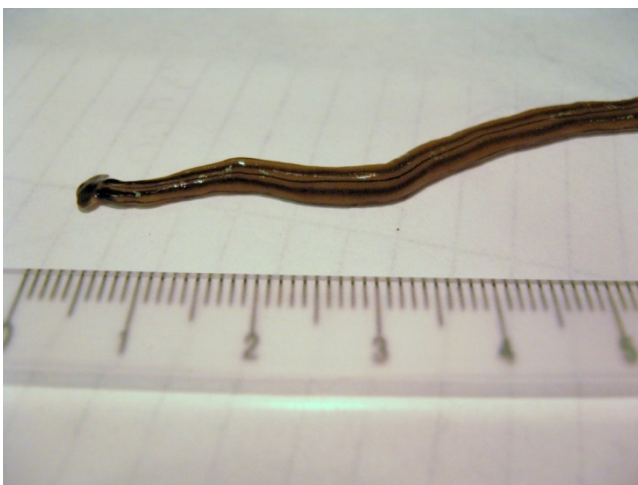

## *Bipalium kewense* K23

| #   | Date       | Locality | Department / State | Country - Continent  | Origin of data    |
|-----|------------|----------|--------------------|----------------------|-------------------|
| K23 | 23/10/2017 | Peyrouse | Haute-Pyrénées     | Met. France - Europe | Tremosa, Clémence |

Note: numerous specimens, collected the same day.

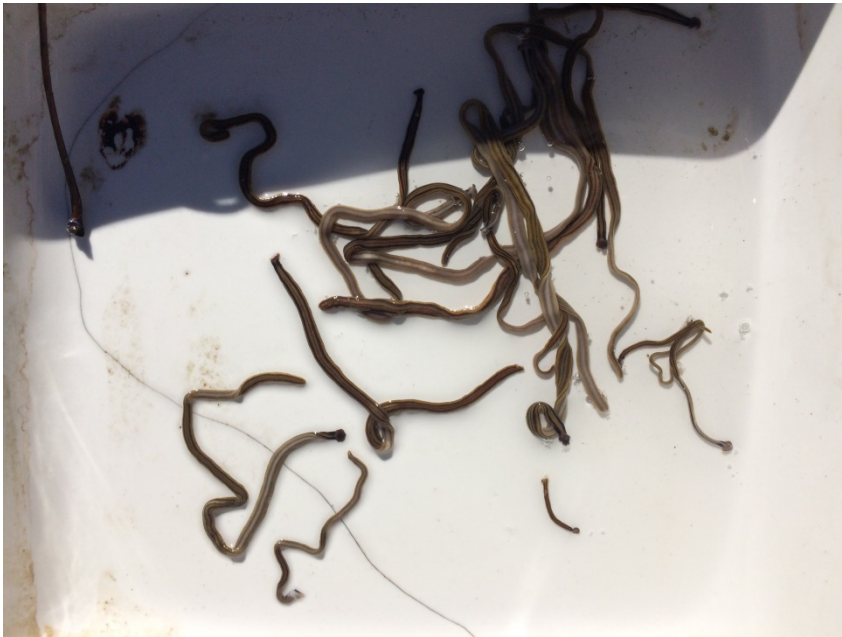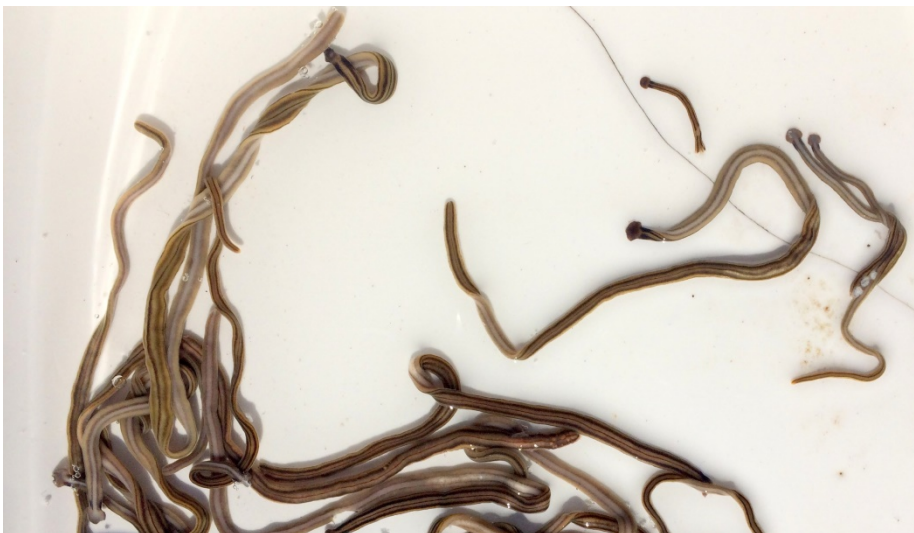



## *Bipalium kewense* K24

| #   | Date       | Locality        | Department / State   | Country - Continent  | Origin of data     |
|-----|------------|-----------------|----------------------|----------------------|--------------------|
| K24 | 17/12/2014 | Arthez de Béarn | Pyrénées-Atlantiques | Met. France - Europe | Sillard, Dominique |

Note: length of animal = 20 cm

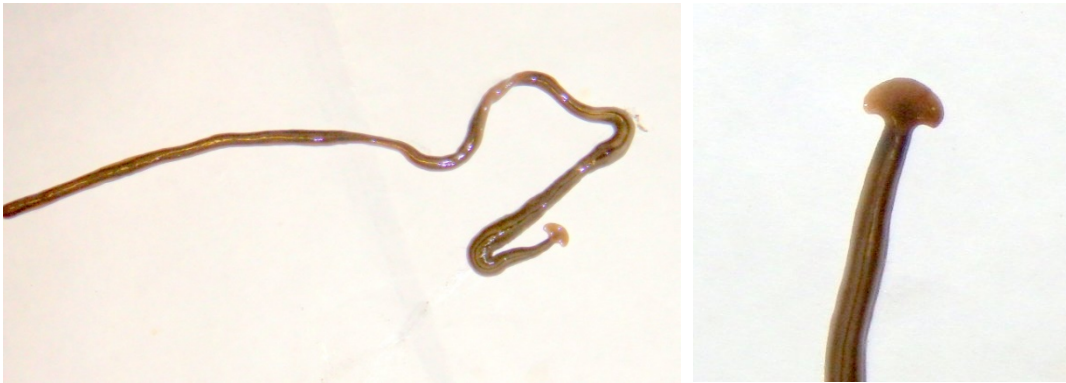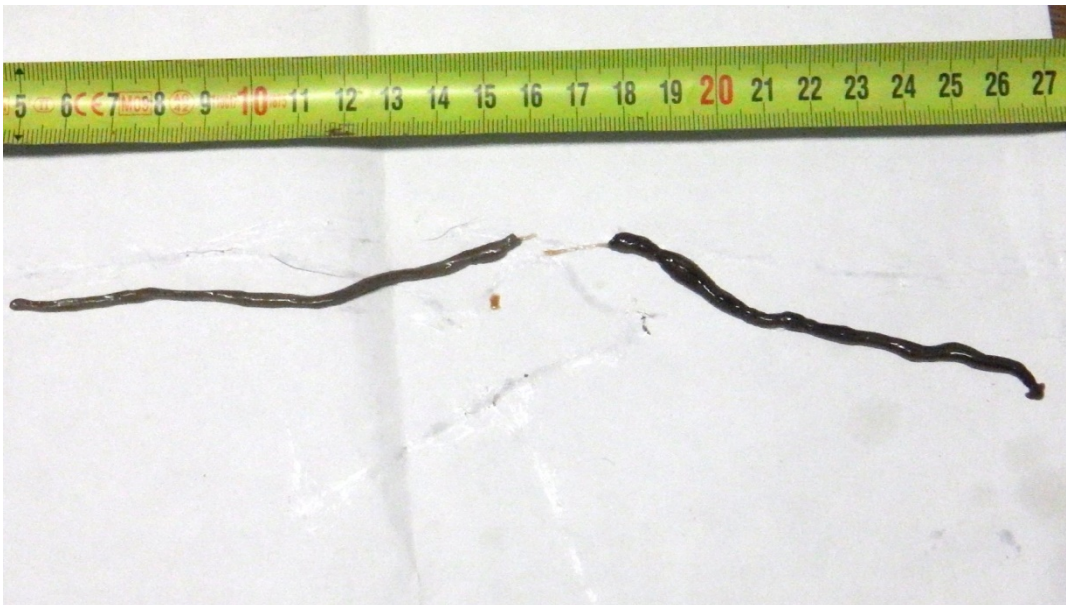

*Bipalium kewense* K25-K26

| #   | Date       | Locality | Department / State   | Country - Continent  | Origin of data              |
|-----|------------|----------|----------------------|----------------------|-----------------------------|
| K25 | 17/09/2017 | Billère  | Pyrénées-Atlantiques | Met. France - Europe | Rolland-Martinez, Geneviève |

Note: length of animal = 27 cm

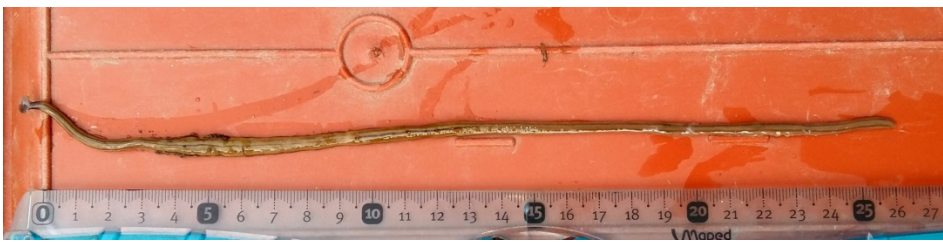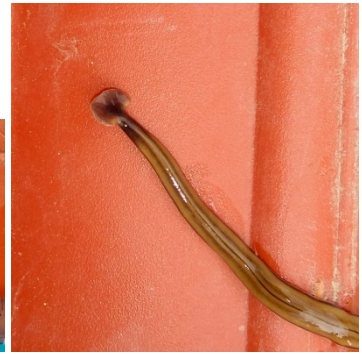

| #   | Date       | Locality | Department / State   | Country - Continent  | Origin of data              |
|-----|------------|----------|----------------------|----------------------|-----------------------------|
| K26 | 28/01/2018 | Billère  | Pyrénées-Atlantiques | Met. France - Europe | Rolland-Martinez, Geneviève |

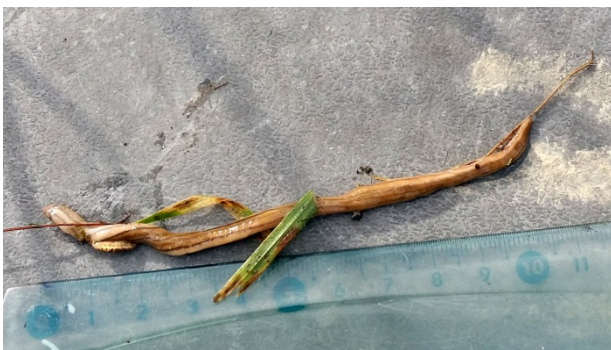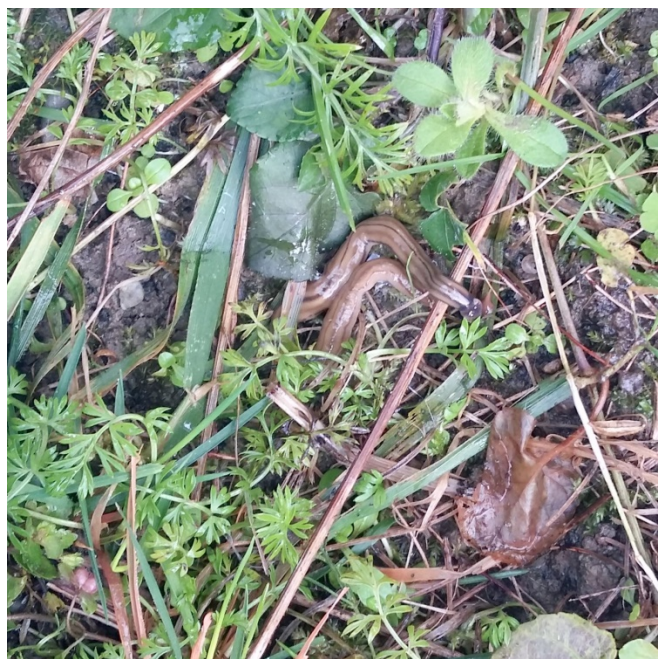

## *Bipalium kewense* K27

| #   | Date       | Locality | Department / State   | Country - Continent  | Origin of data      |
|-----|------------|----------|----------------------|----------------------|---------------------|
| K27 | 20/09/2014 | Bayonne  | Pyrénées-Atlantiques | Met. France - Europe | Bonnefous, François |

Note: Also *Parakontikia ventrolineata*.

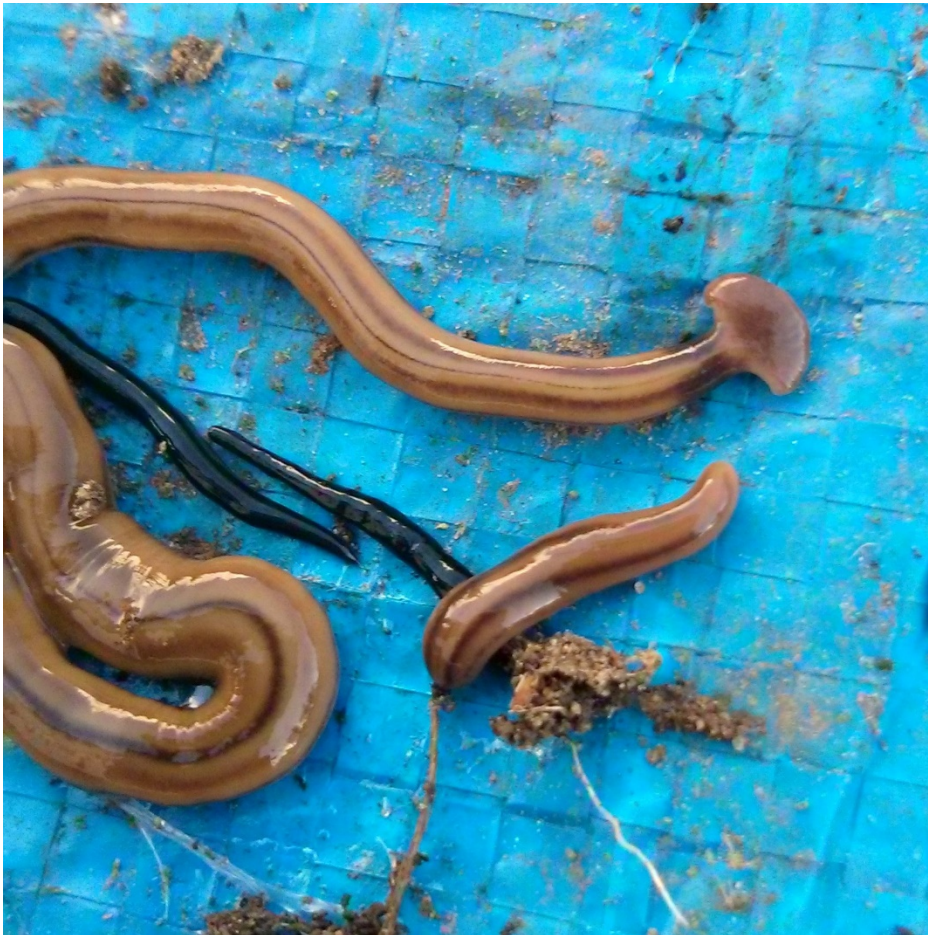

*Bipalium kewense* K28

| #   | Date       | Locality  | Department / State   | Country - Continent  | Origin of data  |
|-----|------------|-----------|----------------------|----------------------|-----------------|
| K28 | 18/08/2014 | Hasparren | Pyrénées-Atlantiques | Met. France - Europe | Voise, Mireille |

Note: length of animal = 15 cm

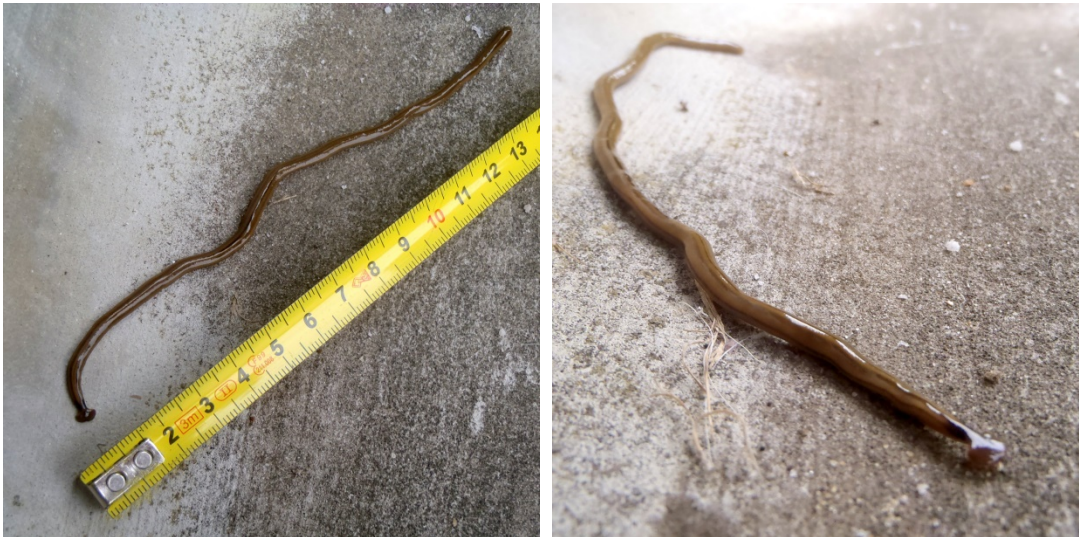*Bipalium kewense* K29

| #   | Date       | Locality        | Department / State   | Country - Continent  | Origin of data      |
|-----|------------|-----------------|----------------------|----------------------|---------------------|
| K29 | 22/04/2016 | Jurançon (near) | Pyrénées-Atlantiques | Met. France - Europe | Pauchet, Marjolaine |

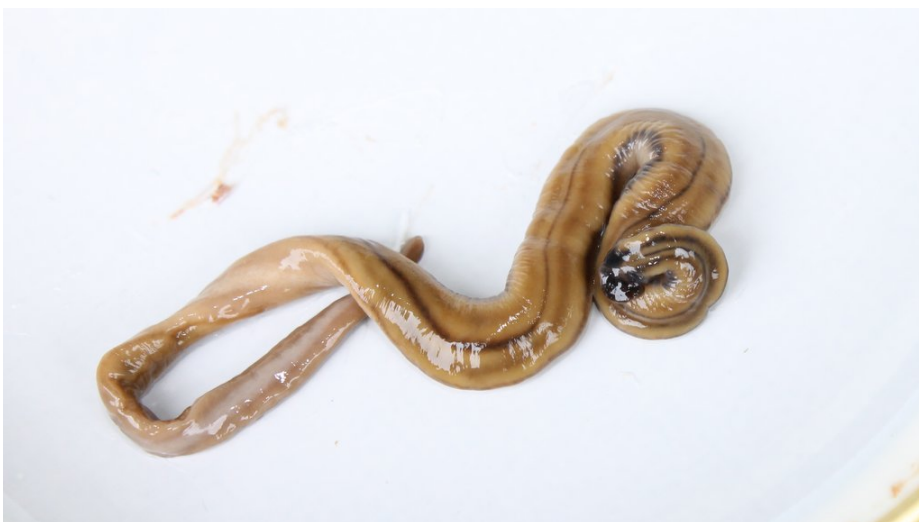

## *Bipalium kewense* K30

| #   | Date       | Locality | Department / State   | Country - Continent  | Origin of data    |
|-----|------------|----------|----------------------|----------------------|-------------------|
| K30 | 29/04/2016 | Nay      | Pyrénées-Atlantiques | Met. France - Europe | Lamaille, Corinne |

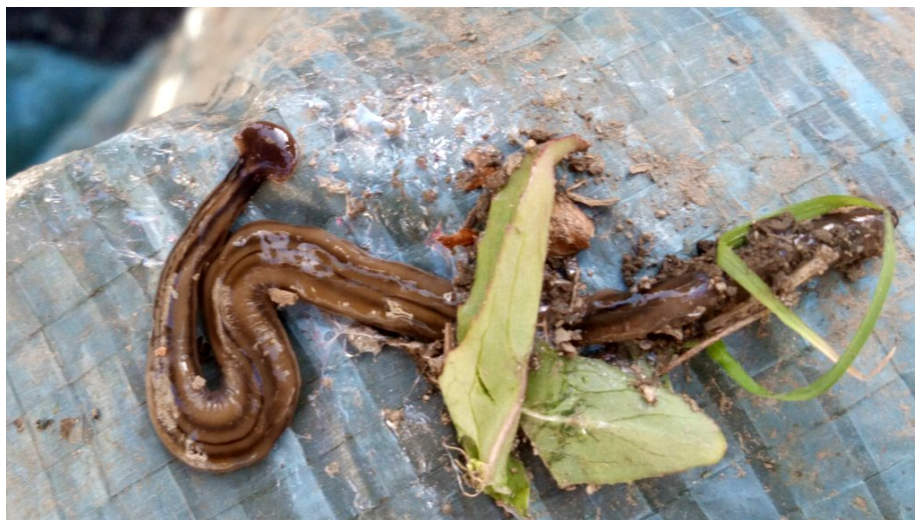

## *Bipalium kewense* K31

| #   | Date       | Locality | Department / State   | Country - Continent  | Origin of data     |
|-----|------------|----------|----------------------|----------------------|--------------------|
| K31 | 28/09/2014 | Orthez   | Pyrénées-Atlantiques | Met. France - Europe | Rougeux, Christian |

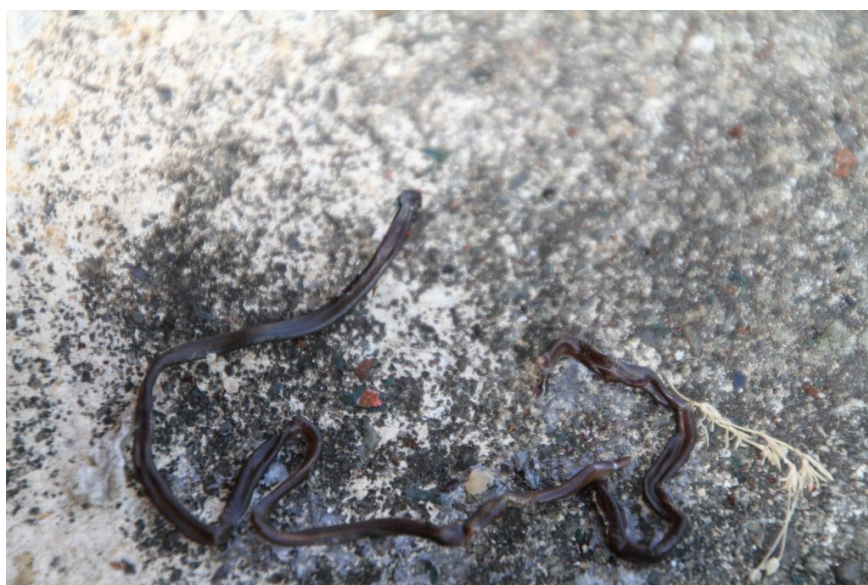

## *Bipalium kewense* K32

| #   | Date       | Locality          | Department / State   | Country - Continent  | Origin of data   |
|-----|------------|-------------------|----------------------|----------------------|------------------|
| K32 | 22/08/2016 | Saint Jean de Luz | Pyrénées-Atlantiques | Met. France - Europe | Centelles, Ruben |

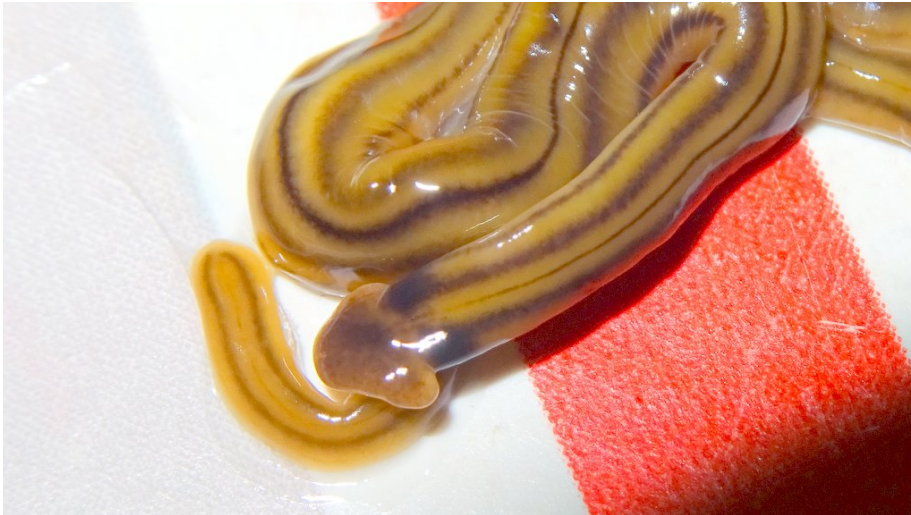

## *Bipalium kewense* K33

| #   | Date       | Locality | Department / State   | Country - Continent  | Origin of data  |
|-----|------------|----------|----------------------|----------------------|-----------------|
| K33 | 01/01/1999 | Urcuit   | Pyrénées-Atlantiques | Met. France - Europe | Esposito, Mario |

Note: images extracted from movie. Early record (1999).

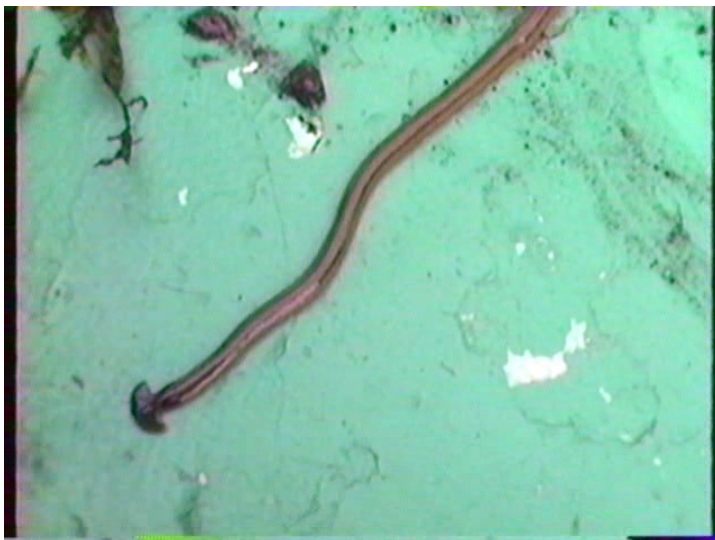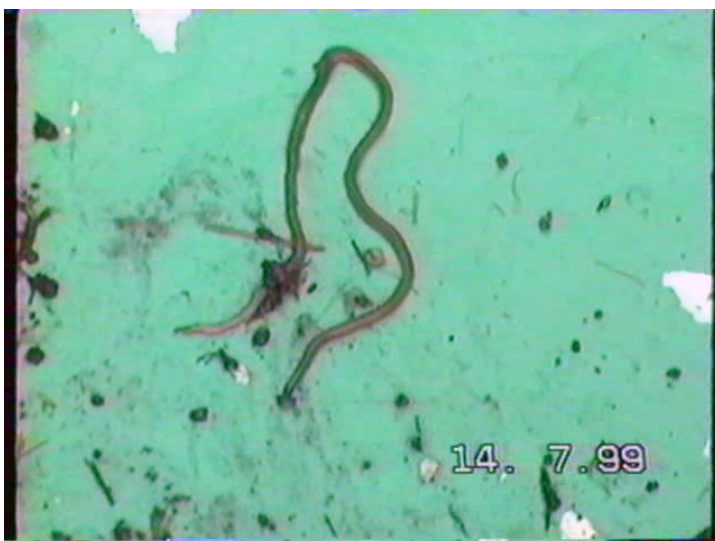

## *Bipalium kewense* K34

| #   | Date       | Locality | Department / State   | Country - Continent  | Origin of data     |
|-----|------------|----------|----------------------|----------------------|--------------------|
| K34 | 14/09/2014 | Urt      | Pyrénées-Atlantiques | Met. France - Europe | Chanderot, Vincent |

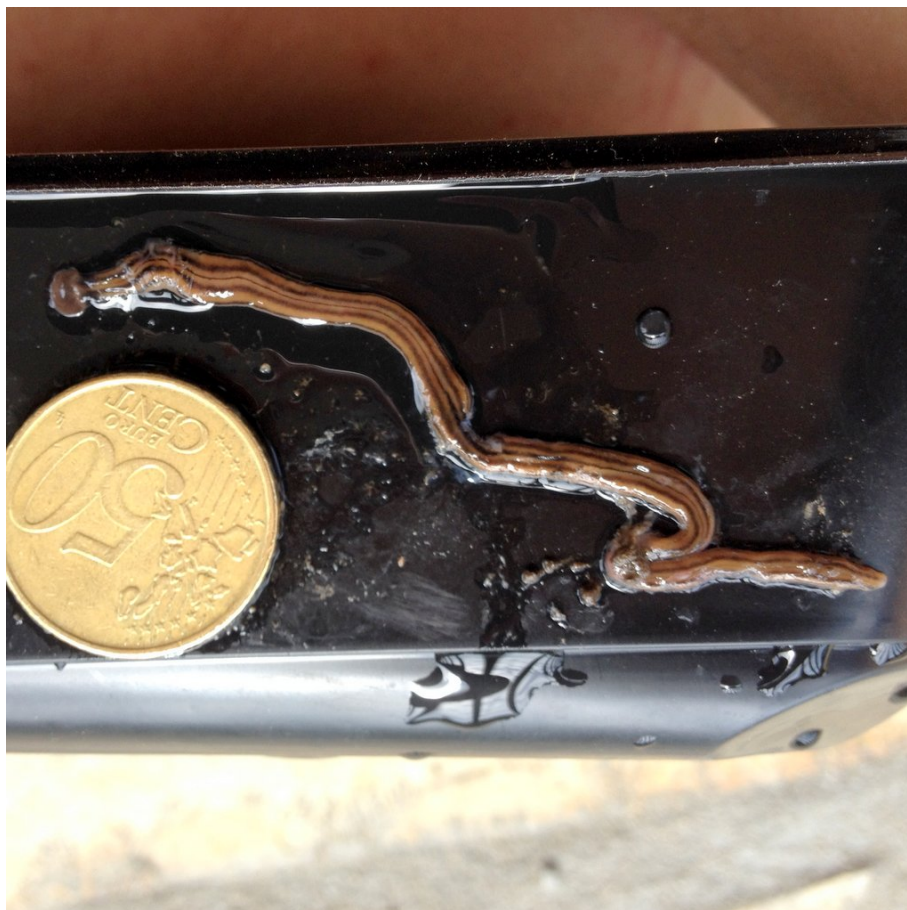



## *Bipalium kewense* K35

| #   | Date       | Locality | Department / State   | Country - Continent  | Origin of data                |
|-----|------------|----------|----------------------|----------------------|-------------------------------|
| K35 | 12/08/2017 | Ustaritz | Pyrénées-Atlantiques | Met. France - Europe | Lescourret, Monique & Bernard |

Note: length of animal = 17 cm

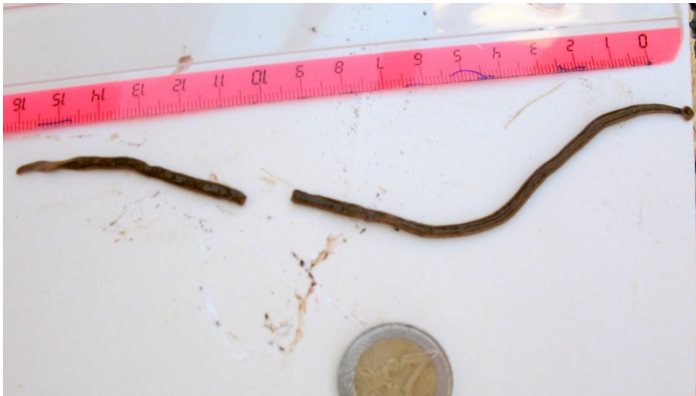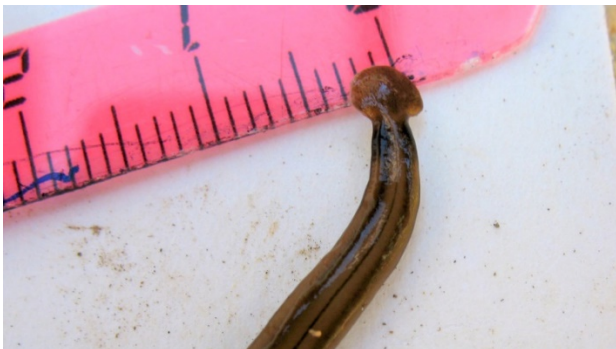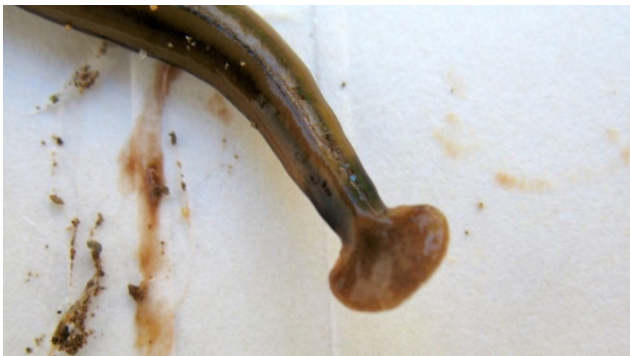

## *Bipalium kewense* K36

| #   | Date       | Locality     | Department / State   | Country - Continent  | Origin of data       |
|-----|------------|--------------|----------------------|----------------------|----------------------|
| K36 | 14/09/2014 | Villefranque | Pyrénées-Atlantiques | Met. France - Europe | Consent not obtained |

## *Diversibipalium multilineatum*: Records

### Records of *Diversibipalium multilineatum* identified from photographs.

| #          | Date       | Locality           | Department / State   | Country - Continent  | Origin                  |
|------------|------------|--------------------|----------------------|----------------------|-------------------------|
| <b>M01</b> | 27/06/2010 | Longages           | Haute-Garonne        | Met. France - Europe | Lombard, Yoann          |
| <b>M02</b> | 22/03/2011 | Longages           | Haute-Garonne        | Met. France - Europe | Lombard, Yoann          |
| <b>M03</b> | 06/07/2016 | Saint-Egrève       | Isère                | Met. France - Europe | Tuailon, Jean-Louis     |
| <b>M04</b> | 17/05/2017 | Saint-Egrève       | Isère                | Met. France - Europe | Tuailon, Jean-Louis     |
| <b>M05</b> | 27/06/2016 | Benquet            | Landes               | Met. France - Europe | Broustaut, François     |
| <b>M06</b> | 28/03/2014 | Cahors (Hothouse)  | Lot                  | Met. France - Europe | Consent not obtained    |
| <b>M07</b> | 04/07/2014 | Andilly (Hothouse) | Val d'Oise           | Met. France - Europe | Burel, Jonathan *       |
| <b>M08</b> | 27/04/2015 | Magny-en-Vexin     | Val d'Oise           | Met. France - Europe | Mellac, Céline          |
| <b>M09</b> | 29/05/2016 | Magny-en-Vexin     | Val d'Oise           | Met. France - Europe | Mellac, Céline          |
| <b>M10</b> | 19/04/2010 | Sames              | Pyrénées-Atlantiques | Met. France - Europe | Grenier-Falaise, Nadine |
| <b>M11</b> | 07/04/2017 | Billère            | Pyrénées-Atlantiques | Met. France - Europe | Vincent, Jean-François  |

\* FREDON.

## *Diversibipalium multilineatum* M01-M02

Note: two observations, 2010 and 2011, same locality, same observer.

| #   | Date       | Locality | Department / State | Country - Continent  | Origin         |
|-----|------------|----------|--------------------|----------------------|----------------|
| M01 | 27/06/2010 | Longages | Haute-Garonne      | Met. France - Europe | Lombard, Yoann |

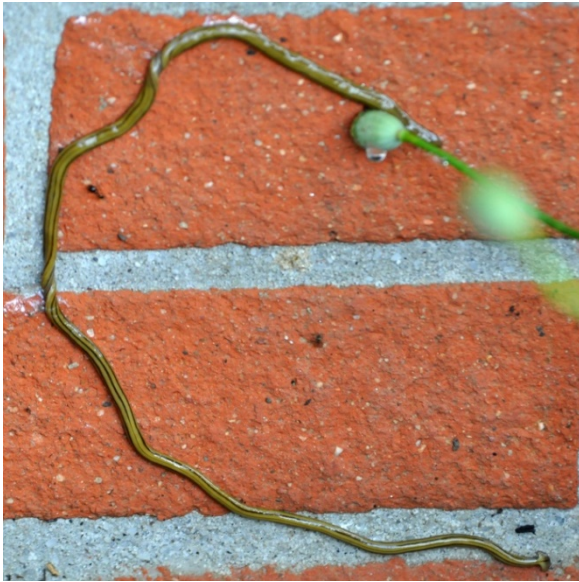

| #   | Date       | Locality | Department / State | Country - Continent  | Origin         |
|-----|------------|----------|--------------------|----------------------|----------------|
| M02 | 22/03/2011 | Longages | Haute-Garonne      | Met. France - Europe | Lombard, Yoann |

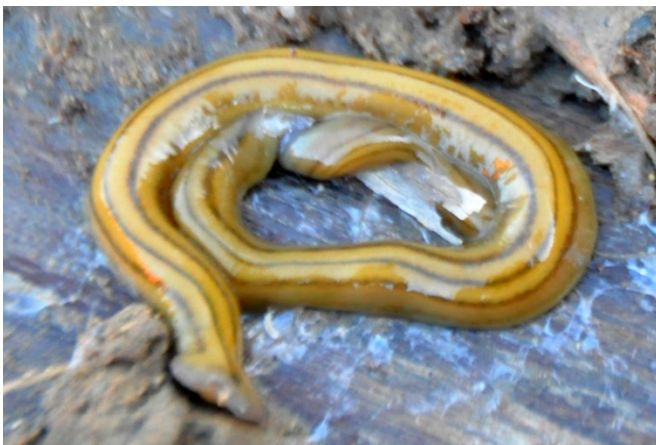

## *Diversibipalium multilineatum* M03-M04

Two observations in the same garden, 2016 and 2017.

| #   | Date       | Locality     | Department / State | Country - Continent  | Origin                |
|-----|------------|--------------|--------------------|----------------------|-----------------------|
| M03 | 06/07/2016 | Saint-Egrève | Isère              | Met. France - Europe | Tuailleon, Jean-Louis |

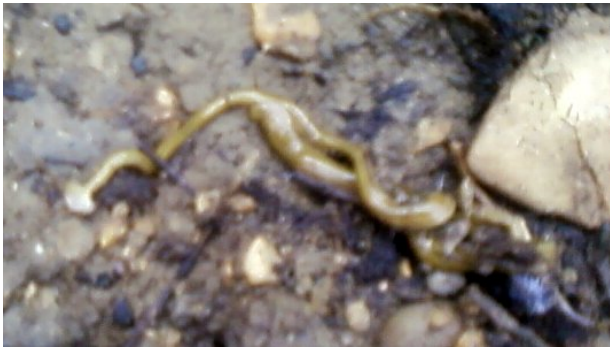

| #   | Date       | Locality     | Department / State | Country - Continent  | Origin                |
|-----|------------|--------------|--------------------|----------------------|-----------------------|
| M04 | 17/05/2017 | Saint-Egrève | Isère              | Met. France - Europe | Tuailleon, Jean-Louis |

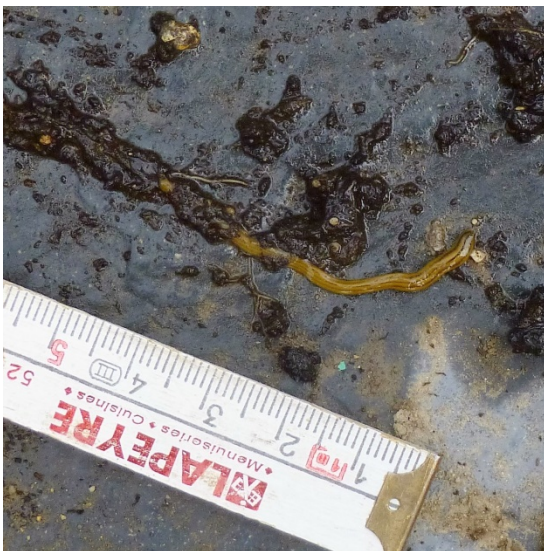

## *Diversibipalium multilineatum* M05

| #   | Date       | Locality | Department / State | Country - Continent  | Origin              |
|-----|------------|----------|--------------------|----------------------|---------------------|
| M05 | 27/06/2016 | Benquet  | Landes             | Met. France - Europe | Broustaut, François |

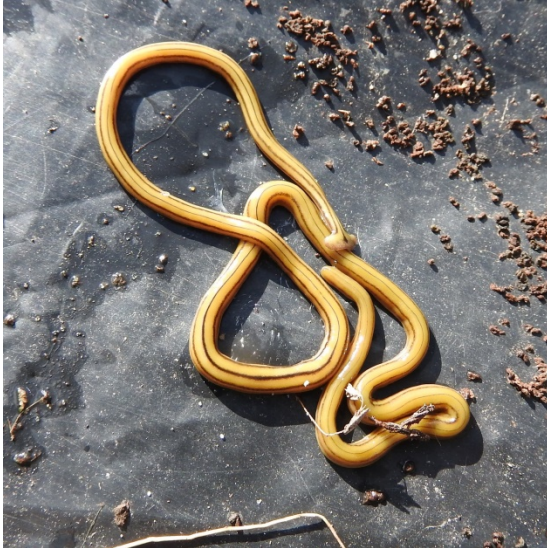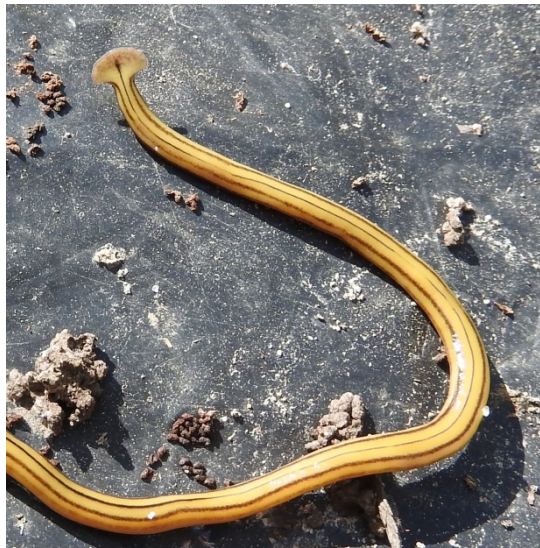

## *Diversibipalium multilineatum* M06

| #   | Date       | Locality          | Department / State | Country - Continent  | Origin               |
|-----|------------|-------------------|--------------------|----------------------|----------------------|
| M06 | 28/03/2014 | Cahors (Hothouse) | Lot                | Met. France - Europe | Consent not obtained |

## *Diversibipalium multilineatum* M07

| #   | Date       | Locality           | Department / State | Country - Continent  | Origin            |
|-----|------------|--------------------|--------------------|----------------------|-------------------|
| M07 | 04/07/2014 | Andilly (Hothouse) | Val d'Oise         | Met. France - Europe | Burel, Jonathan * |

Note: with *Obama nungara*

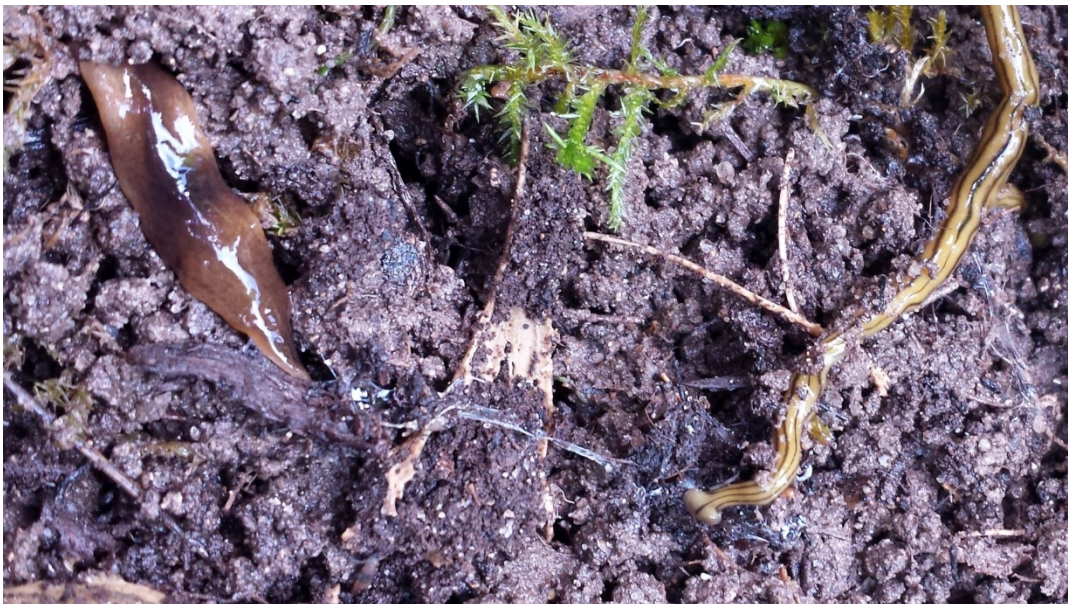

## *Diversibipalium multilineatum* M08-M09

Note: two observations, same garden, 2015 and 2016.

| #   | Date       | Locality       | Department / State | Country - Continent  | Origin         |
|-----|------------|----------------|--------------------|----------------------|----------------|
| M08 | 27/04/2015 | Magny-en-Vexin | Val d'Oise         | Met. France - Europe | Mellac, Céline |

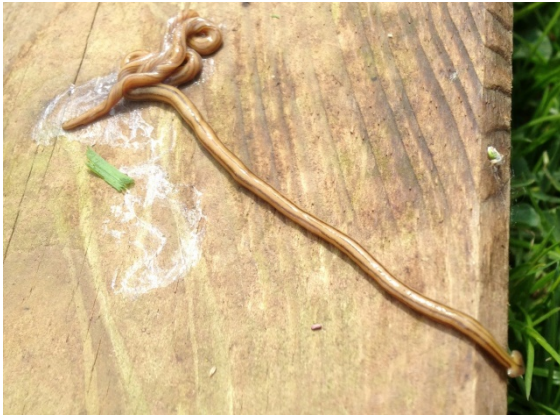

| #   | Date       | Locality       | Department / State | Country - Continent  | Origin         |
|-----|------------|----------------|--------------------|----------------------|----------------|
| M09 | 29/05/2016 | Magny-en-Vexin | Val d'Oise         | Met. France - Europe | Mellac, Céline |

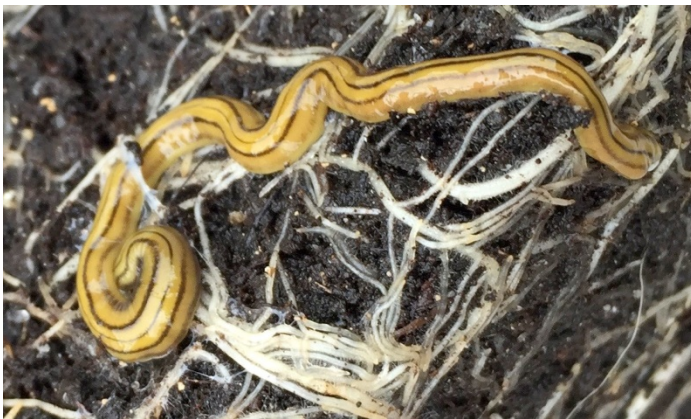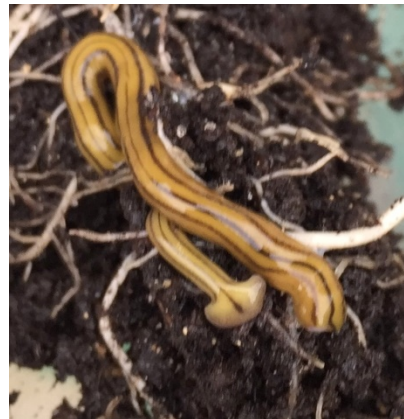

## *Diversibipalium multilineatum* M10

| #   | Date       | Locality | Department / State   | Country - Continent  | Origin                  |
|-----|------------|----------|----------------------|----------------------|-------------------------|
| M10 | 19/04/2010 | Sames    | Pyrénées-Atlantiques | Met. France - Europe | Grenier-Falaise, Nadine |

Note: early record, 2010

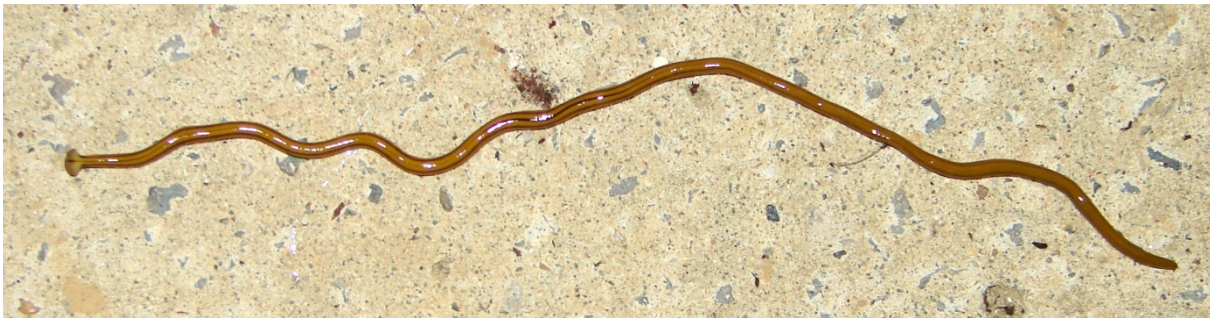



## *Diversibipalium multilineatum* M11

| #   | Date       | Locality | Department / State   | Country - Continent  | Origin                 |
|-----|------------|----------|----------------------|----------------------|------------------------|
| M11 | 07/04/2017 | Billère  | Pyrénées-Atlantiques | Met. France - Europe | Vincent, Jean-François |

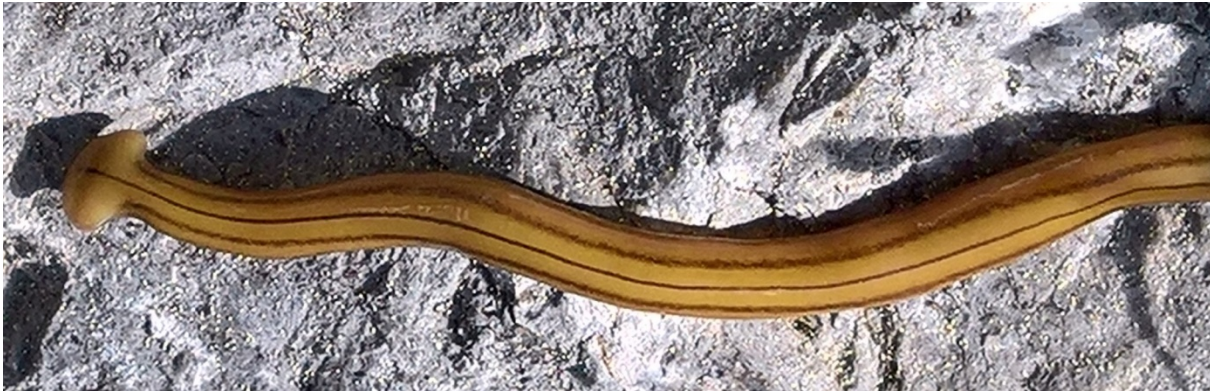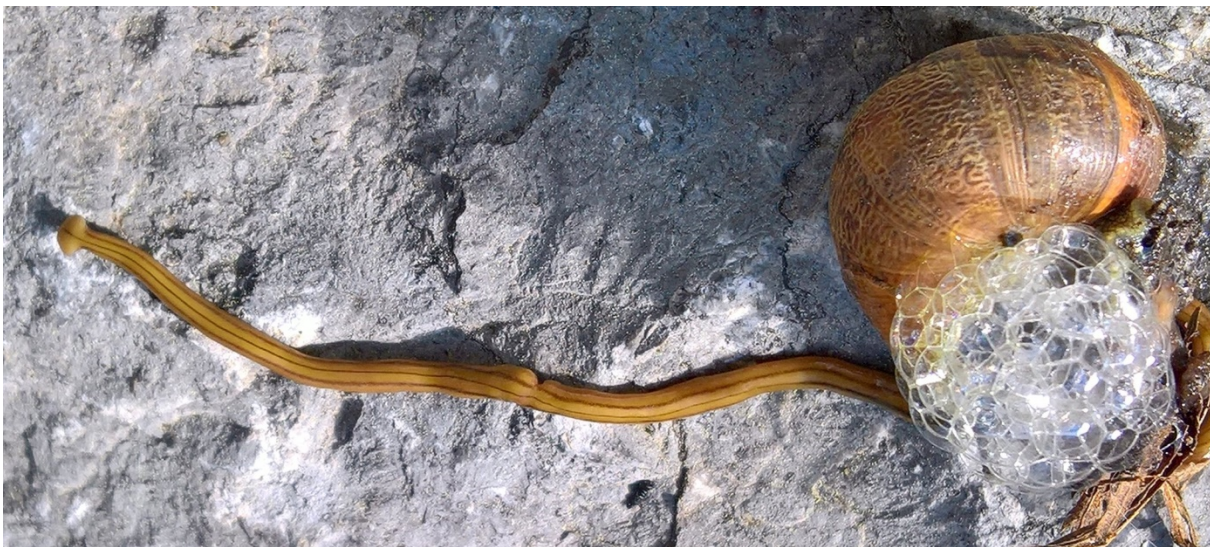

# *Bipalium vagum*: Records

## Records of *Bipalium vagum* identified from photographs

| #   | Date       | Locality                | Department / State | Country - Continent           | Origin                        |
|-----|------------|-------------------------|--------------------|-------------------------------|-------------------------------|
| V01 | 21/06/2005 | Cayenne                 | French Guiana      | French Guiana – S. America    | Girault, Rémi                 |
| V02 | 15/05/2017 | Macouria                | French Guiana      | French Guiana – S. America    | Boutin, Élodie                |
| V03 | 12/05/2017 | Saint-Laurent-du-Maroni | French Guiana      | French Guiana – S. America    | Muraine, François Xavier      |
| V04 | 26/07/2017 | Saül                    | French Guiana      | French Guiana – S. America    | Sant, Sébastien               |
| V05 | 21/08/2017 | Petit-Bourg             | Guadeloupe         | French Guiana – S. America    | De Tienda, Marine             |
| V06 | 24/11/2013 | Gosier                  | Guadeloupe         | Guadeloupe - C. America       | Consent not obtained          |
| V07 | 30/10/2016 | Gosier                  | Guadeloupe         | Guadeloupe - C. America       | Brisson, Bernard              |
| V08 | 22/11/2013 | Petit Bourg             | Guadeloupe         | Guadeloupe - C. America       | Oettly, Olivier               |
| V09 | 22/11/2014 | Petit Bourg             | Guadeloupe         | Guadeloupe - C. America       | Marques, Maryvonne            |
| V10 | 29/04/2011 | Petit-Bourg             | Guadeloupe         | Guadeloupe - C. America       | Guezennec, Pierre et Claudine |
| V11 | 21/10/2017 | Petit-Canal             | Guadeloupe         | Guadeloupe - C. America       | Charles, Laurent              |
| V12 | 29/11/2016 | Le Moule                | Guadeloupe         | Guadeloupe - C. America       | Consent non obtained          |
| V13 | 25/07/2010 | La Trinité              | Martinique         | Martinique - C. America       | Delannoye, Régis              |
| V14 | 18/11/2015 | Morne Vert              | Martinique         | Martinique - C. America       | Coulis, Mathieu               |
| V15 | 05/01/2018 | Trois Ilets             | Martinique         | Martinique - C. America       | Consent non obtained          |
| V16 | 01/04/2014 | Saint Barthélemy        | Saint Barthélemy   | Saint Barthélemy - C. America | Moulard, Grégory              |
| V17 | 01/05/2014 | Saint Barthélemy        | Saint Barthélemy   | Saint Barthélemy - C. America | Consent not obtained          |
| V18 | 11/05/2014 | Saint Martin            | Saint Martin       | Saint Martin – C. America     | Yokoyama, Mark                |
| V19 | 21/11/2015 | Avirons                 | La Réunion         | La Réunion - Africa           | Consent not obtained          |
| V20 | 23/03/2017 | Bras Panon              | La Réunion         | La Réunion - Africa           | Saman-Latchimy, Teddy         |
| V21 | 29/03/2017 | Le Tampon               | La Réunion         | La Réunion - Africa           | Consent not obtained          |
| V22 | 26/10/2014 | Petite Ile              | La Réunion         | La Réunion - Africa           | Abonnenc, José                |
| V23 | 12/03/2016 | Petite Ile              | La Réunion         | La Réunion - Africa           | Le Gars, René                 |
| V24 | 16/05/2014 | Saint Louis             | La Réunion         | La Réunion - Africa           | Faujour, Anne                 |
| V25 | 08/04/2014 | Saint Paul              | La Réunion         | La Réunion - Africa           | Consent not obtained          |
| V26 | 16/03/2016 | Saint Pierre            | La Réunion         | La Réunion - Africa           | Collet, Jean                  |
| V27 | 10/03/2013 | Sainte Marie            | La Réunion         | La Réunion - Africa           | Fontaine, Romuald             |
| V28 | 06/03/2016 | Sainte Marie            | La Réunion         | La Réunion - Africa           | Fontaine, Romuald             |
| V29 | 12/02/2009 | unknown                 | La Réunion         | La Réunion - Africa           | Gilson, Michel                |
| V30 | 03/03/2010 | unknown                 | La Réunion         | La Réunion - Africa           | Gilson, Michel                |
| V31 | 01/05/2011 | unknown                 | La Réunion         | La Réunion - Africa           | Martiré, Dominique            |
| V32 | 28/10/2013 | unknown                 | La Réunion         | La Réunion - Africa           | Martiré, Dominique            |
| V33 | 17/08/2015 | unknown                 | La Réunion         | La Réunion - Africa           | Lacoste, Marie                |

## *Bipalium vagum* V01

| #   | Date       | Locality | Department / State | Country - Continent        | Origin        |
|-----|------------|----------|--------------------|----------------------------|---------------|
| V01 | 21/06/2005 | Cayenne  | French Guiana      | French Guiana – S. America | Girault, Rémi |

Note: early record (2005).

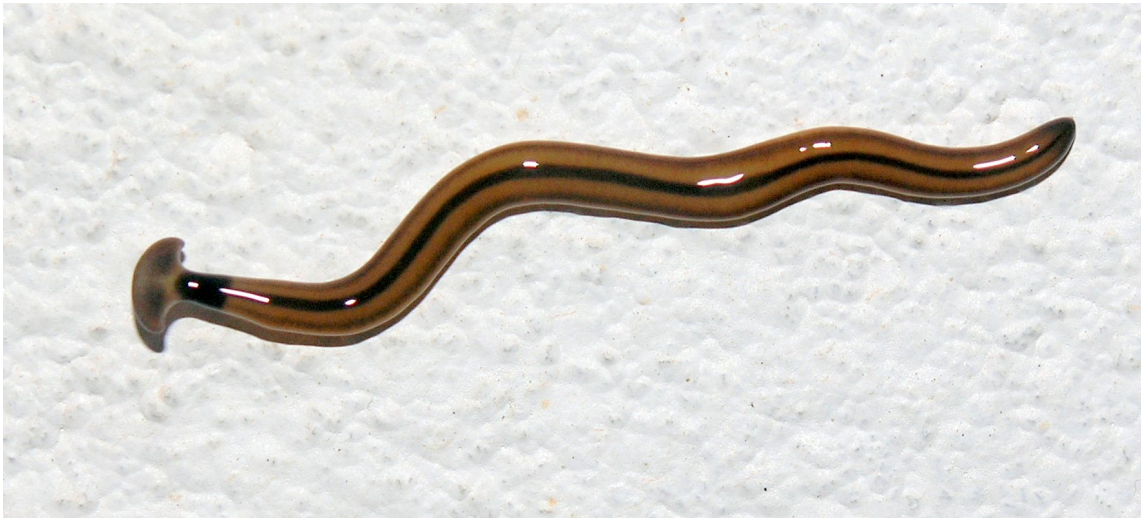

## *Bipalium vagum* V02

| #   | Date       | Locality | Department / State | Country - Continent        | Origin         |
|-----|------------|----------|--------------------|----------------------------|----------------|
| V02 | 15/05/2017 | Macouria | French Guiana      | French Guiana – S. America | Boutin, Élodie |

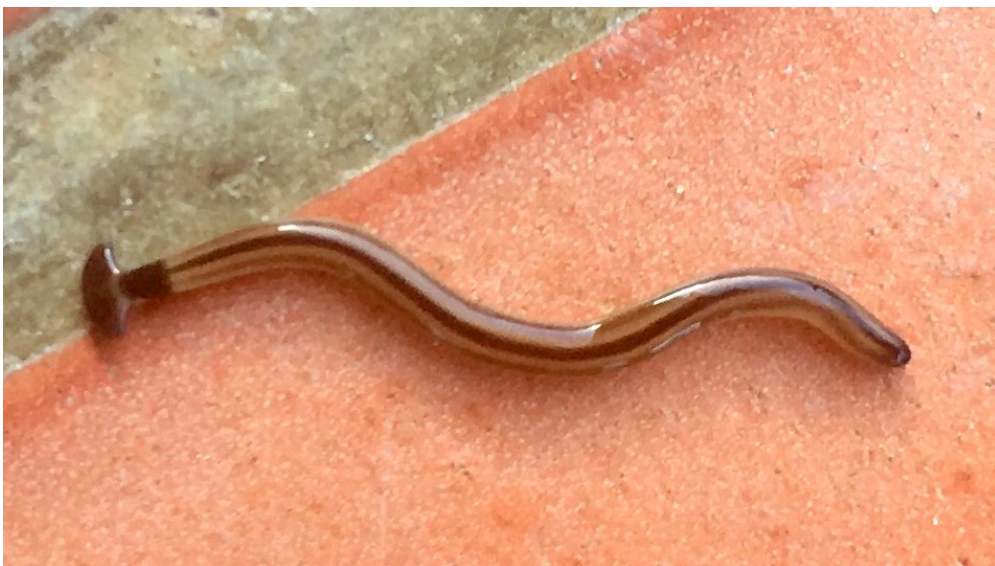

## *Bipalium vagum* V03

| #   | Date       | Locality                | Department / State | Country - Continent        | Origin                   |
|-----|------------|-------------------------|--------------------|----------------------------|--------------------------|
| V03 | 12/05/2017 | Saint-Laurent-du-Maroni | French Guiana      | French Guiana – S. America | Muraine, François Xavier |

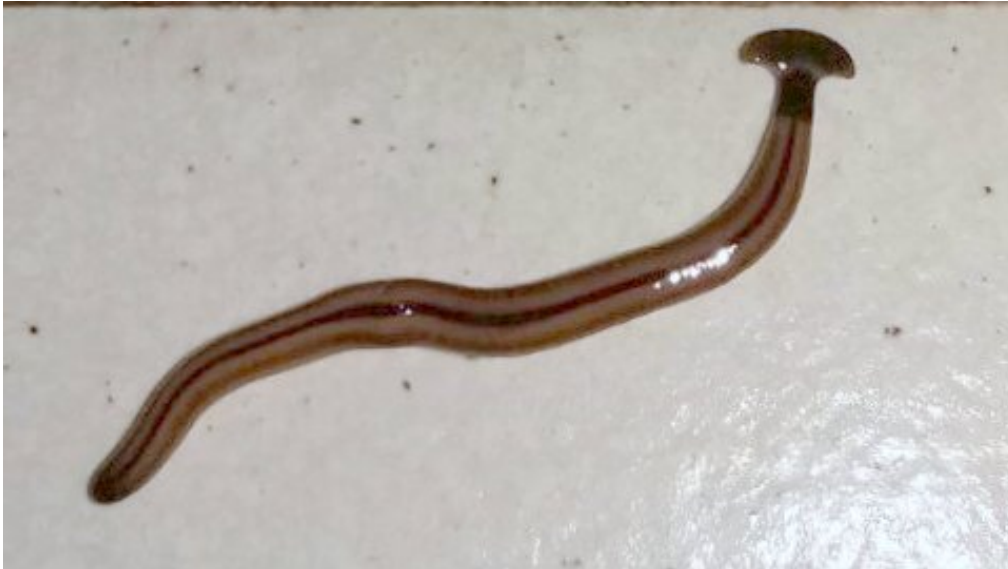

## *Bipalium vagum* V04

| #   | Date       | Locality | Department / State | Country - Continent        | Origin          |
|-----|------------|----------|--------------------|----------------------------|-----------------|
| V04 | 26/07/2017 | Saül     | French Guiana      | French Guiana – S. America | Sant, Sébastien |

Note: the diameter of the 10 euro cent coin is 19.75 mm; the length of the worm is 36 mm at least.

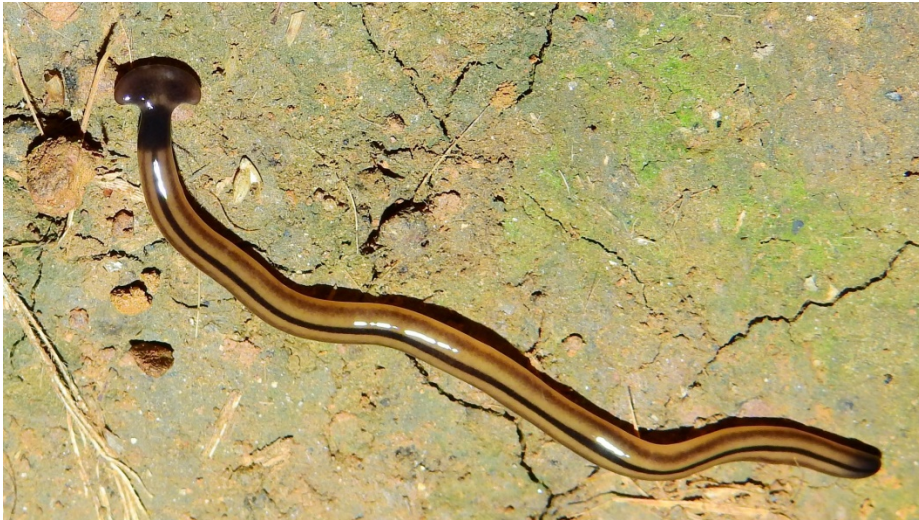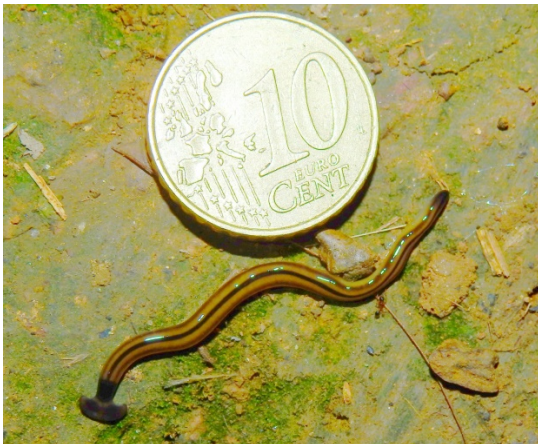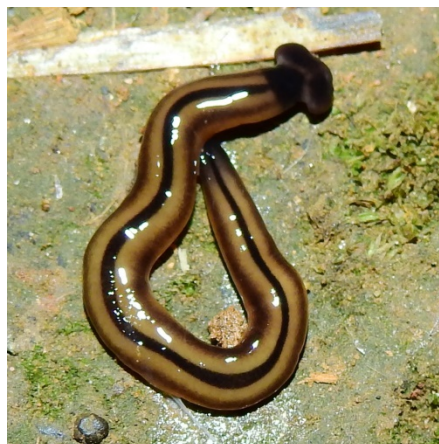

## *Bipalium vagum* V05

| #   | Date       | Locality    | Department / State | Country - Continent        | Origin            |
|-----|------------|-------------|--------------------|----------------------------|-------------------|
| V05 | 21/08/2017 | Petit-Bourg | Guadeloupe         | French Guiana – S. America | De Tienda, Marine |

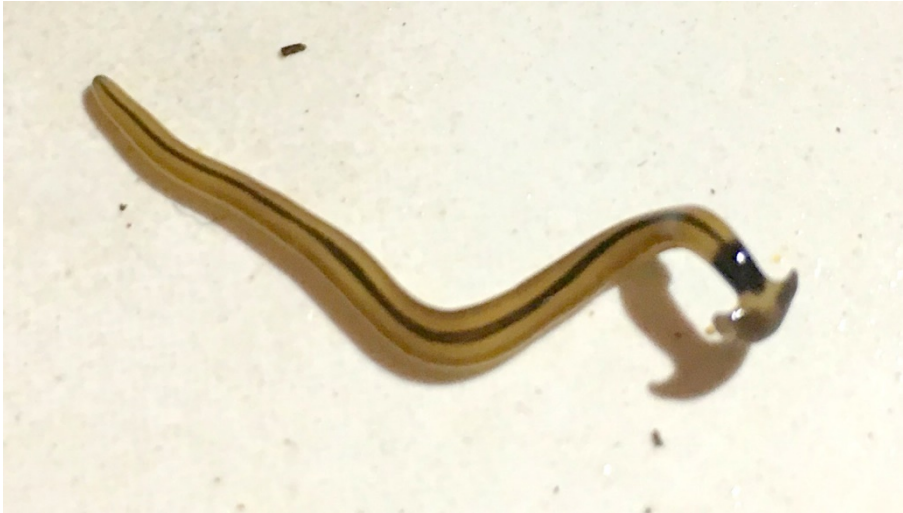

## *Bipalium vagum* V06

| #   | Date       | Locality | Department / State | Country - Continent     | Origin               |
|-----|------------|----------|--------------------|-------------------------|----------------------|
| V06 | 24/11/2013 | Gosier   | Guadeloupe         | Guadeloupe - C. America | Consent not obtained |

## *Bipalium vagum* V07

| #   | Date       | Locality | Department / State | Country - Continent     | Origin           |
|-----|------------|----------|--------------------|-------------------------|------------------|
| V07 | 30/10/2016 | Gosier   | Guadeloupe         | Guadeloupe - C. America | Brisson, Bernard |

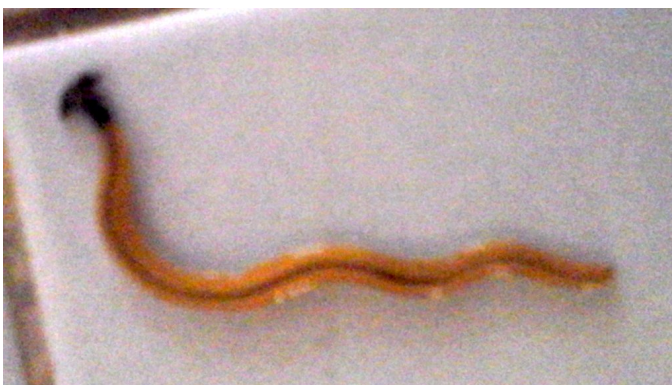

## *Bipalium vagum* V08

| #   | Date       | Locality    | Department / State | Country - Continent     | Origin          |
|-----|------------|-------------|--------------------|-------------------------|-----------------|
| V08 | 22/11/2013 | Petit Bourg | Guadeloupe         | Guadeloupe - C. America | Oettly, Olivier |

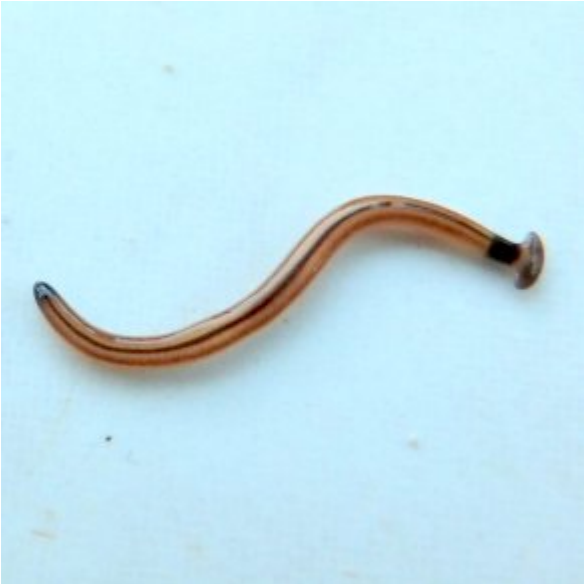

## *Bipalium vagum* V09

| #   | Date       | Locality    | Department / State | Country - Continent     | Origin             |
|-----|------------|-------------|--------------------|-------------------------|--------------------|
| V09 | 22/11/2014 | Petit Bourg | Guadeloupe         | Guadeloupe - C. America | Marques, Maryvonne |

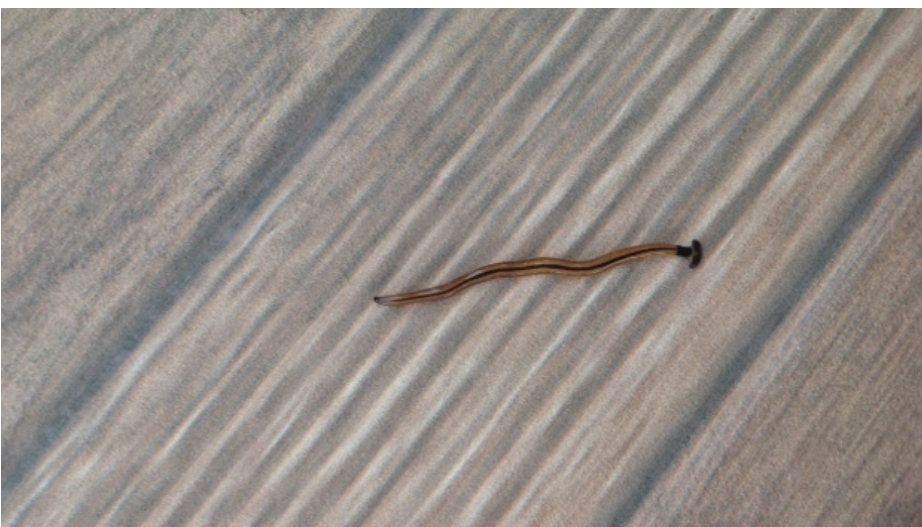

## *Bipalium vagum* V10

| #   | Date       | Locality    | Department / State | Country - Continent     | Origin                        |
|-----|------------|-------------|--------------------|-------------------------|-------------------------------|
| V10 | 29/04/2011 | Petit-Bourg | Guadeloupe         | Guadeloupe - C. America | Guezennec, Pierre et Claudine |

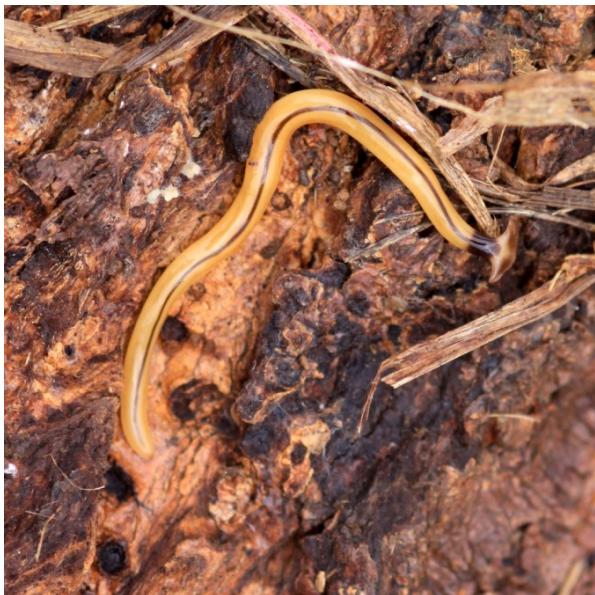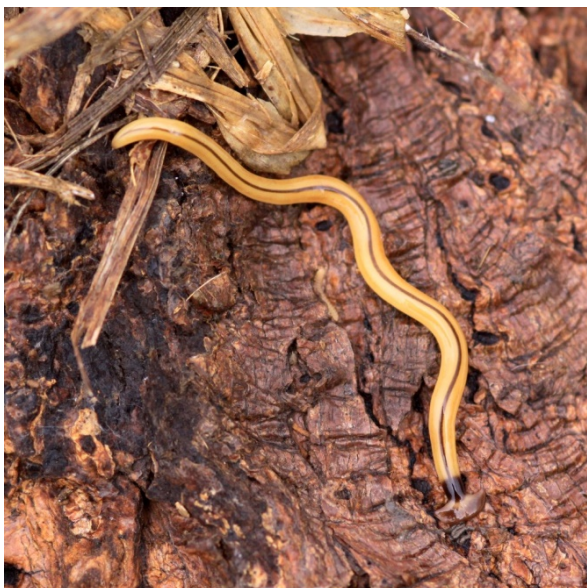



## *Bipalium vagum* V11

| #   | Date       | Locality    | Department / State | Country - Continent     | Origin           |
|-----|------------|-------------|--------------------|-------------------------|------------------|
| V11 | 21/10/2017 | Petit-Canal | Guadeloupe         | Guadeloupe - C. America | Charles, Laurent |

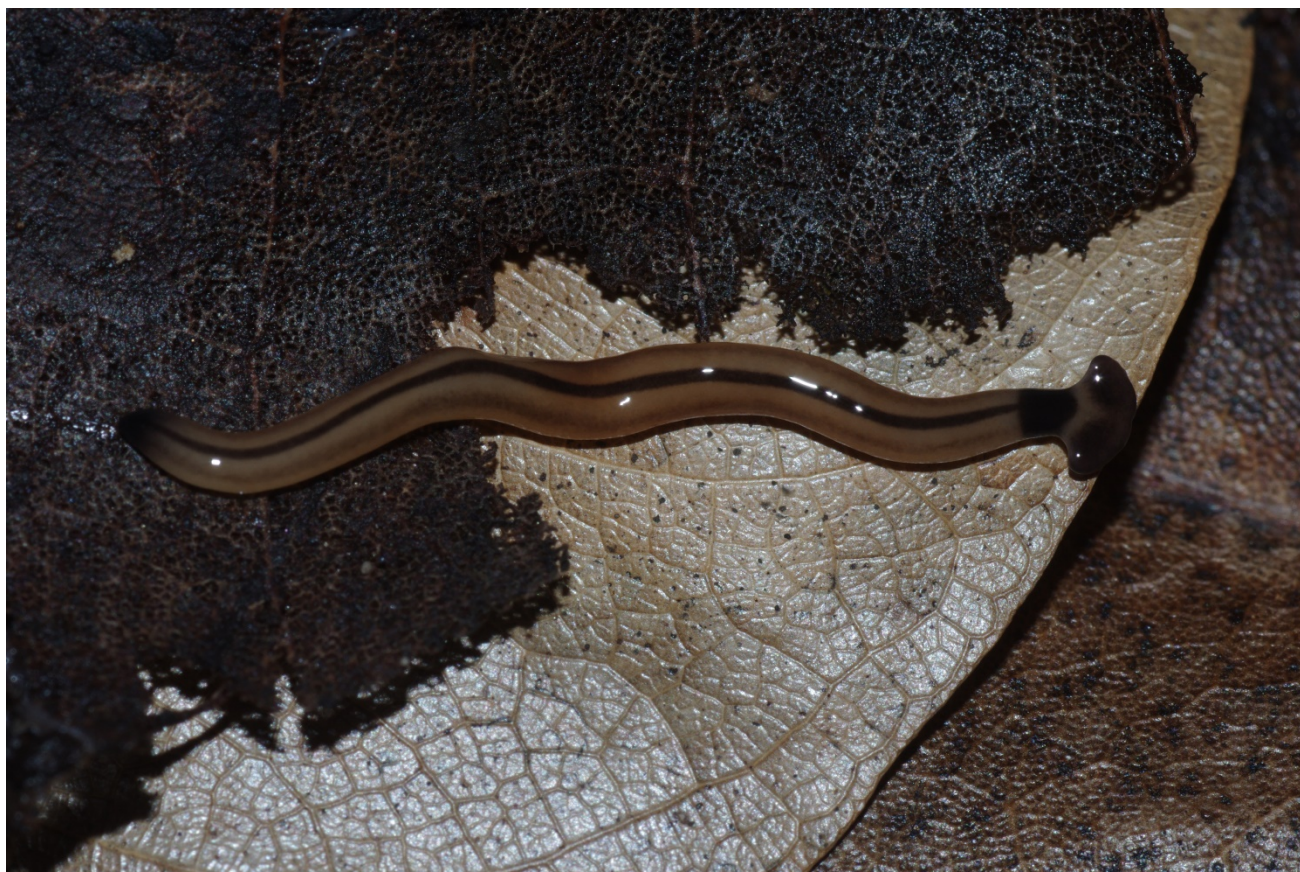

## *Bipalium vagum* V12

| #   | Date       | Locality | Department / State | Country - Continent     | Origin               |
|-----|------------|----------|--------------------|-------------------------|----------------------|
| V12 | 29/11/2016 | Le Moule | Guadeloupe         | Guadeloupe - C. America | Consent not obtained |

## *Bipalium vagum* V13

| #   | Date       | Locality   | Department / State | Country - Continent     | Origin           |
|-----|------------|------------|--------------------|-------------------------|------------------|
| V13 | 25/07/2010 | La Trinité | Martinique         | Martinique - C. America | Delannoye, Régis |

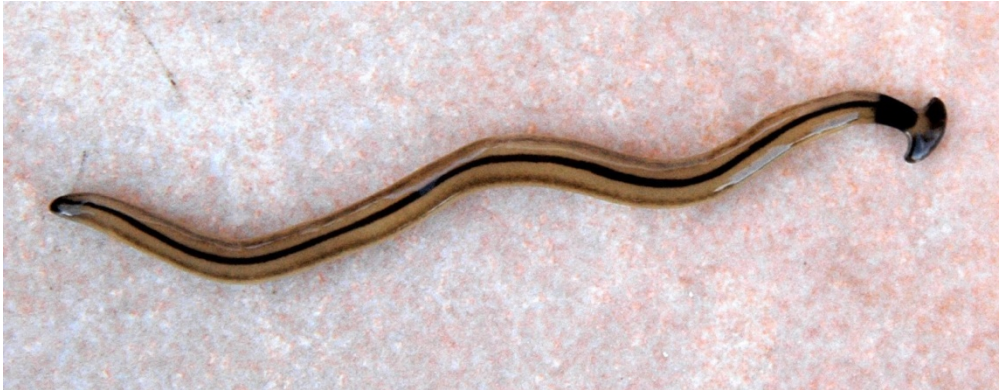

*Bipalium vagum* V14

| #   | Date       | Locality   | Department / State | Country - Continent     | Origin          |
|-----|------------|------------|--------------------|-------------------------|-----------------|
| V14 | 18/11/2015 | Morne Vert | Martinique         | Martinique - C. America | Coulis, Mathieu |

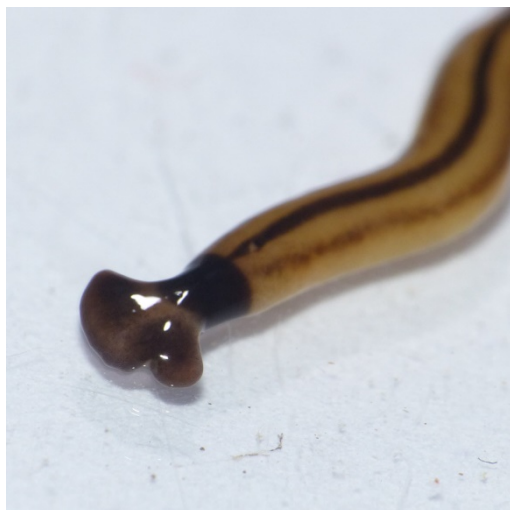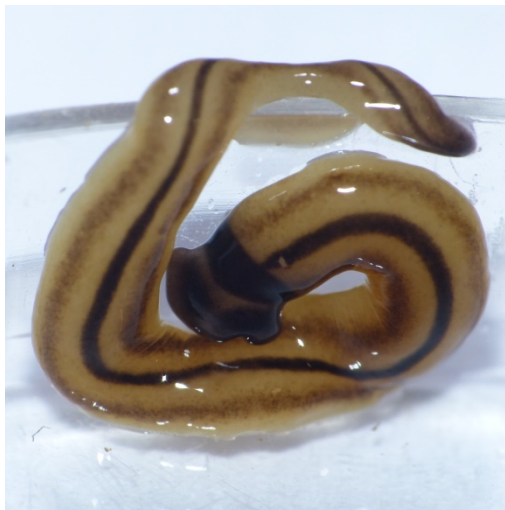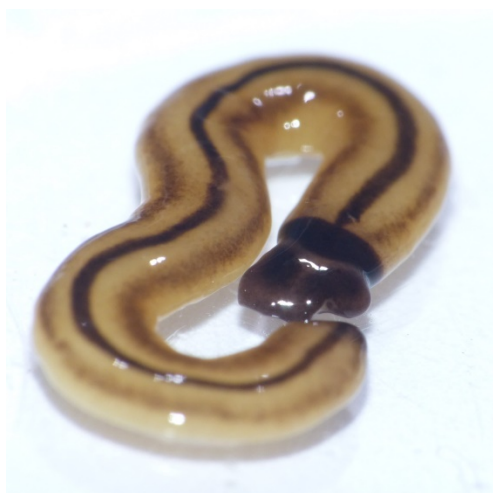*Bipalium vagum* V15

| #   | Date       | Locality    | Department / State | Country - Continent     | Origin               |
|-----|------------|-------------|--------------------|-------------------------|----------------------|
| V15 | 05/01/2018 | Trois Ilets | Martinique         | Martinique - C. America | Consent not obtained |

## *Bipalium vagum* V16

| #   | Date       | Locality         | Department / State | Country - Continent           | Origin           |
|-----|------------|------------------|--------------------|-------------------------------|------------------|
| V16 | 01/04/2014 | Saint Barthélemy | Saint Barthélemy   | Saint Barthélemy - C. America | Moulard, Grégory |

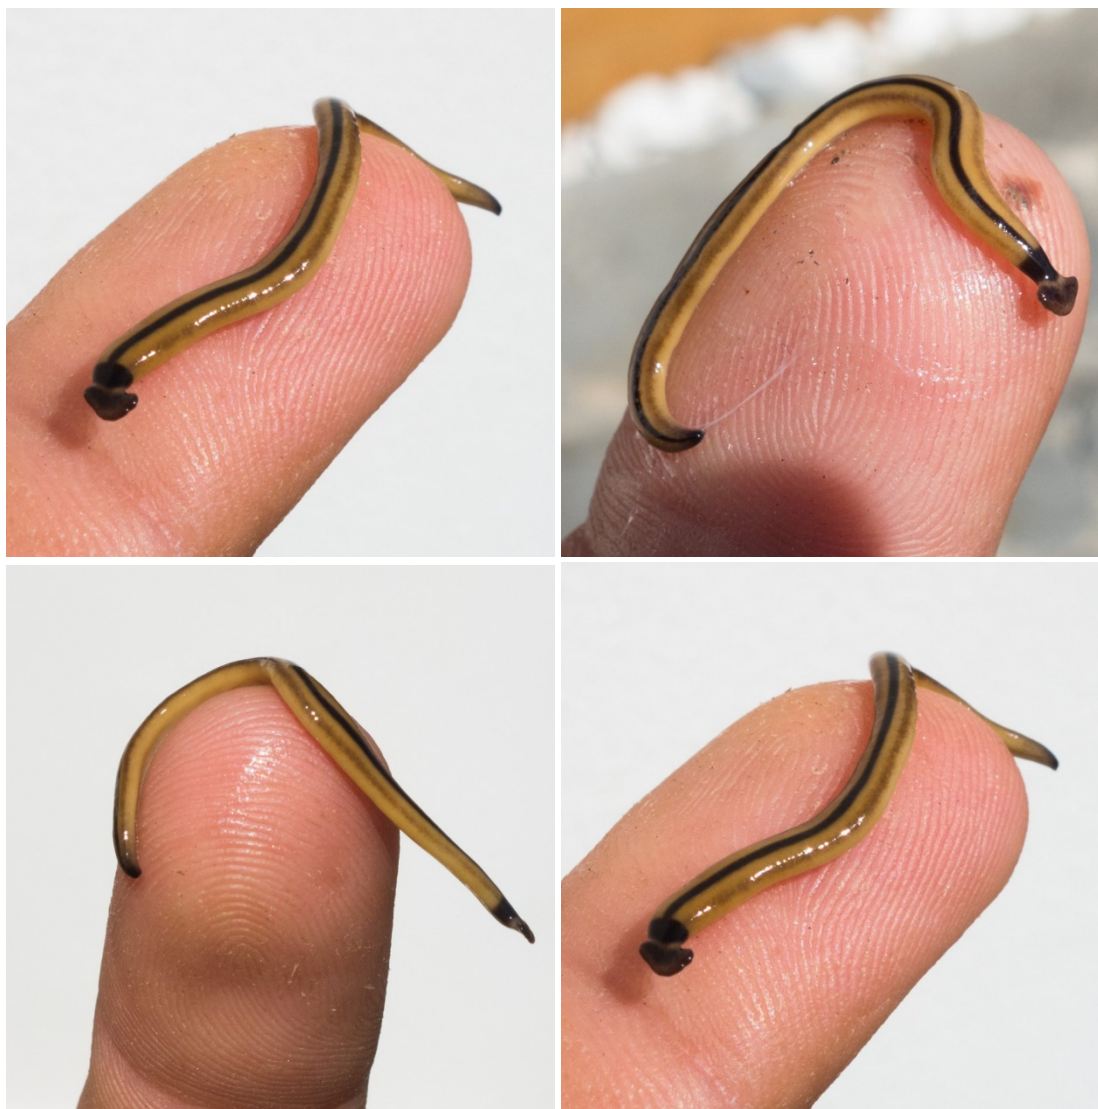

## *Bipalium vagum* V17

| #   | Date       | Locality         | Department / State | Country - Continent           | Origin               |
|-----|------------|------------------|--------------------|-------------------------------|----------------------|
| V17 | 01/05/2014 | Saint Barthélemy | Saint Barthélemy   | Saint Barthélemy - C. America | Consent not obtained |

## *Bipalium vagum* V18

| #   | Date       | Locality     | Department / State | Country - Continent       | Origin         |
|-----|------------|--------------|--------------------|---------------------------|----------------|
| V18 | 11/05/2014 | Saint Martin | Saint Martin       | Saint Martin – C. America | Yokoyama, Mark |

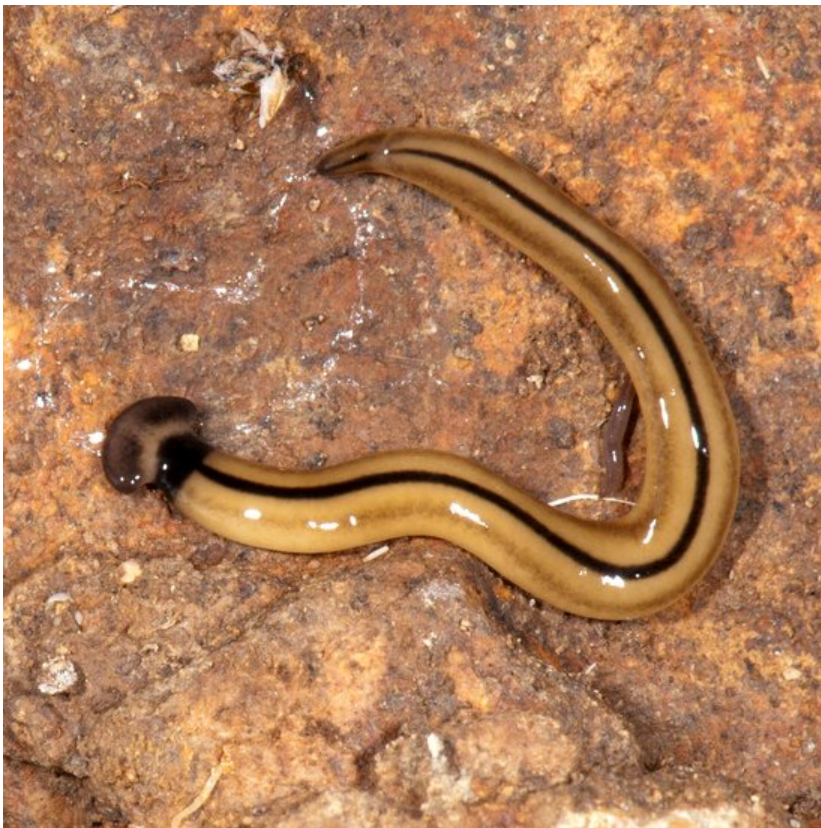

## *Bipalium vagum* V19

| #   | Date       | Locality | Department / State | Country - Continent | Origin               |
|-----|------------|----------|--------------------|---------------------|----------------------|
| V19 | 21/11/2015 | Avirons  | La Réunion         | La Réunion - Africa | Consent not obtained |

## *Bipalium vagum* V20

| #   | Date       | Locality   | Department / State | Country - Continent | Origin                |
|-----|------------|------------|--------------------|---------------------|-----------------------|
| V20 | 23/03/2017 | Bras Panon | La Réunion         | La Réunion - Africa | Saman-Latchimy, Teddy |

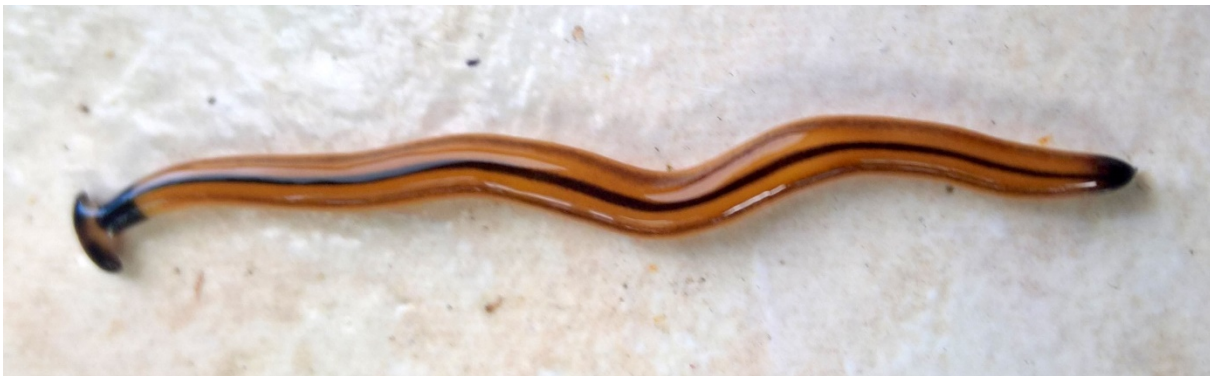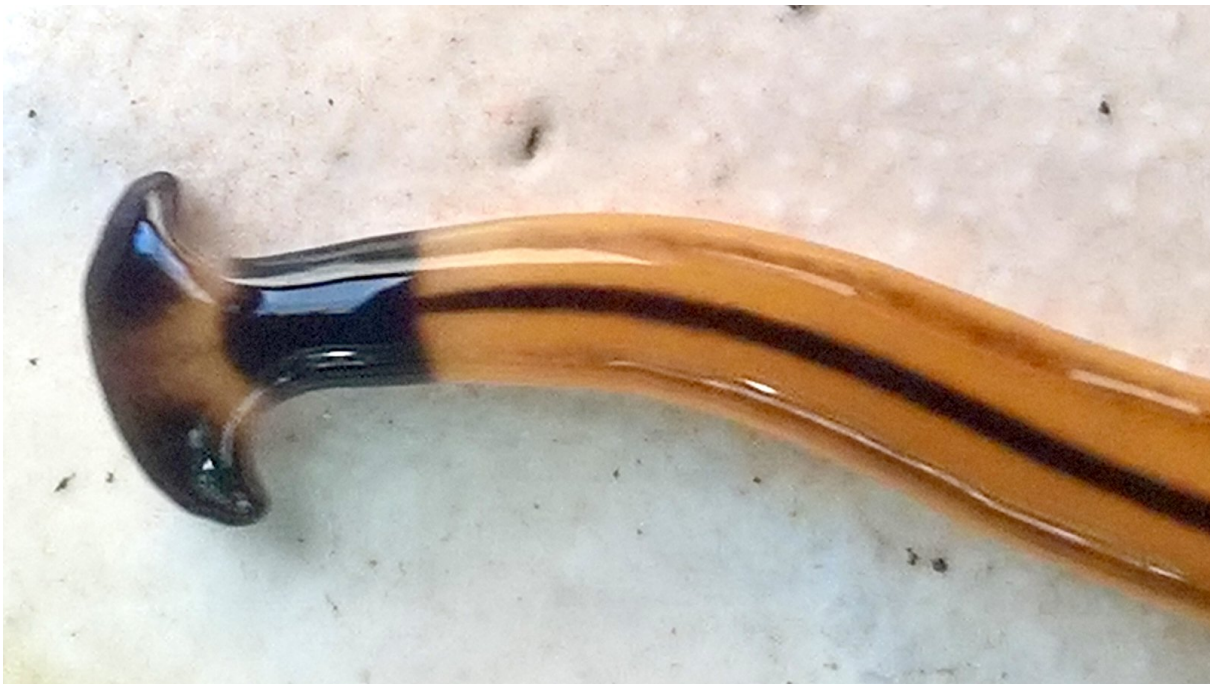

## *Bipalium vagum* V21

| #   | Date       | Locality  | Department / State | Country - Continent | Origin               |
|-----|------------|-----------|--------------------|---------------------|----------------------|
| V21 | 29/03/2017 | Le Tampon | La Réunion         | La Réunion - Africa | Consent not obtained |

## *Bipalium vagum* V22

| #   | Date       | Locality   | Department / State | Country - Continent | Origin         |
|-----|------------|------------|--------------------|---------------------|----------------|
| V22 | 26/10/2014 | Petite Ile | La Réunion         | La Réunion - Africa | Abonnenc, José |

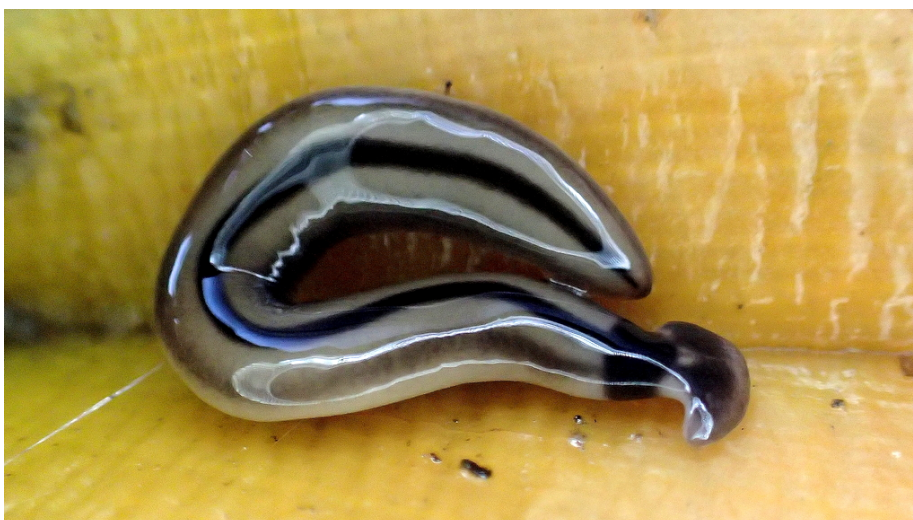

## *Bipalium vagum* V23

| #   | Date       | Locality   | Department / State | Country - Continent | Origin        |
|-----|------------|------------|--------------------|---------------------|---------------|
| V23 | 12/03/2016 | Petite Ile | La Réunion         | La Réunion - Africa | Le Gars, René |

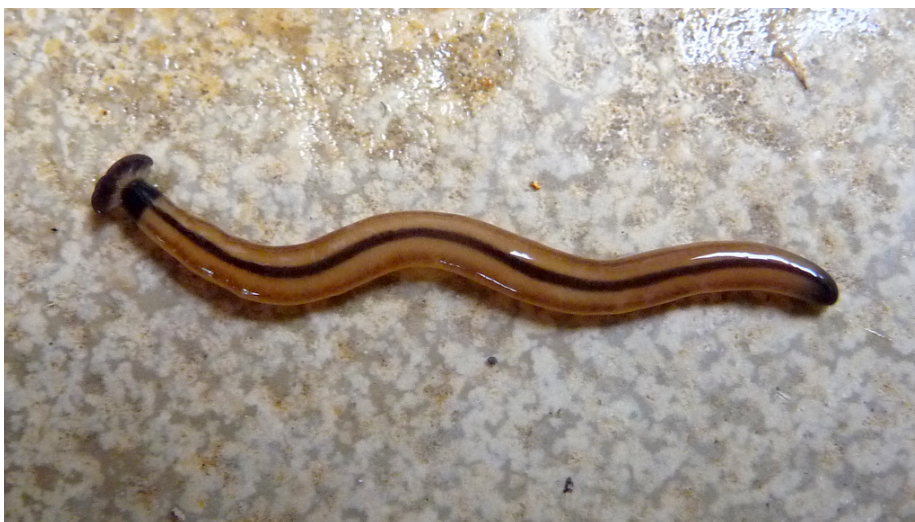

## *Bipalium vagum* V24

| #   | Date       | Locality    | Department / State | Country - Continent | Origin        |
|-----|------------|-------------|--------------------|---------------------|---------------|
| V24 | 16/05/2014 | Saint Louis | La Réunion         | La Réunion - Africa | Faujour, Anne |

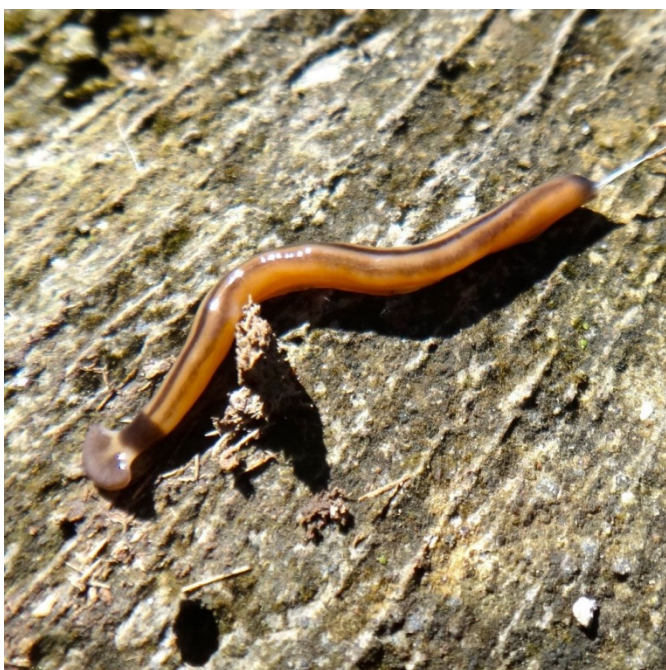



## *Bipalium vagum* V25

| #   | Date       | Locality   | Department / State | Country - Continent | Origin               |
|-----|------------|------------|--------------------|---------------------|----------------------|
| V25 | 08/04/2014 | Saint Paul | La Réunion         | La Réunion - Africa | Consent not obtained |

## *Bipalium vagum* V26

| #   | Date       | Locality     | Department / State | Country - Continent | Origin       |
|-----|------------|--------------|--------------------|---------------------|--------------|
| V26 | 16/03/2016 | Saint Pierre | La Réunion         | La Réunion - Africa | Collet, Jean |

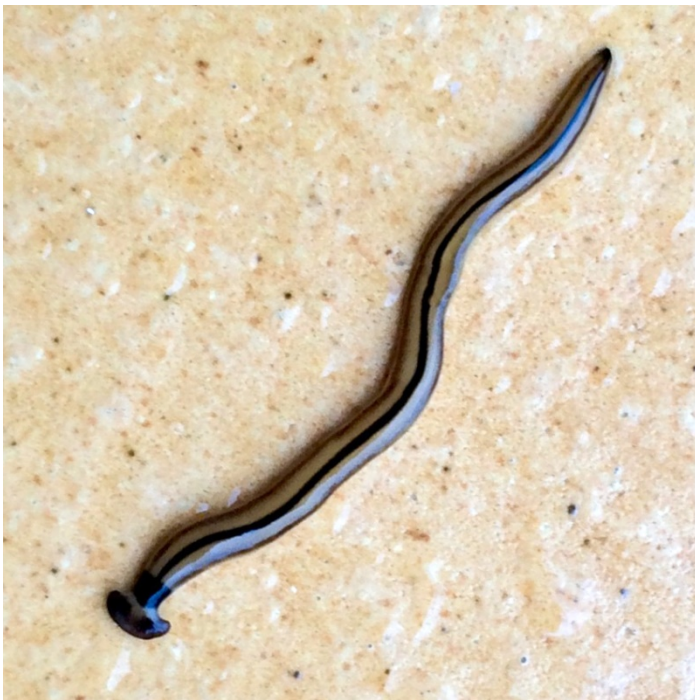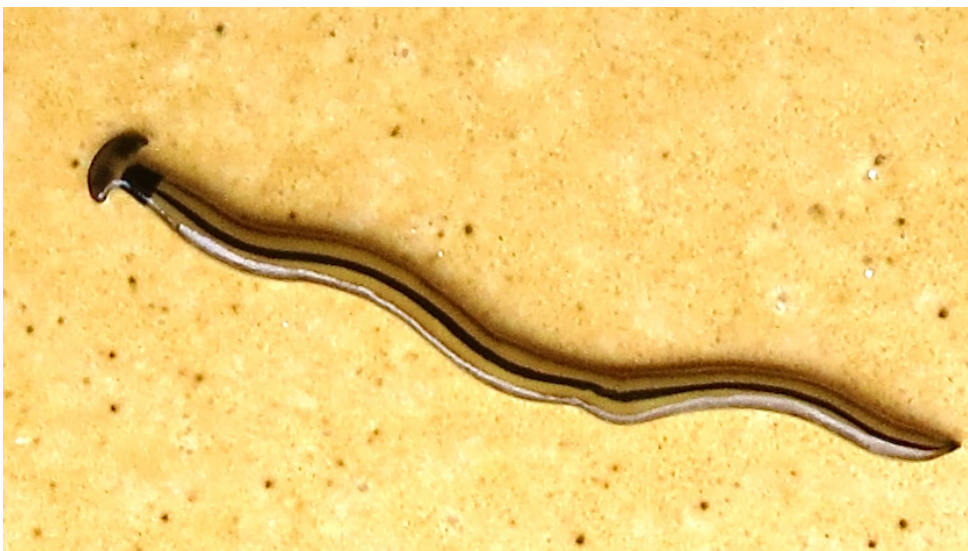

## *Bipalium vagum* V27-V28

Note: two observations, 2013 and 2016

| #   | Date       | Locality     | Department / State | Country - Continent | Origin            |
|-----|------------|--------------|--------------------|---------------------|-------------------|
| V27 | 10/03/2013 | Sainte Marie | La Réunion         | La Réunion - Africa | Fontaine, Romuald |

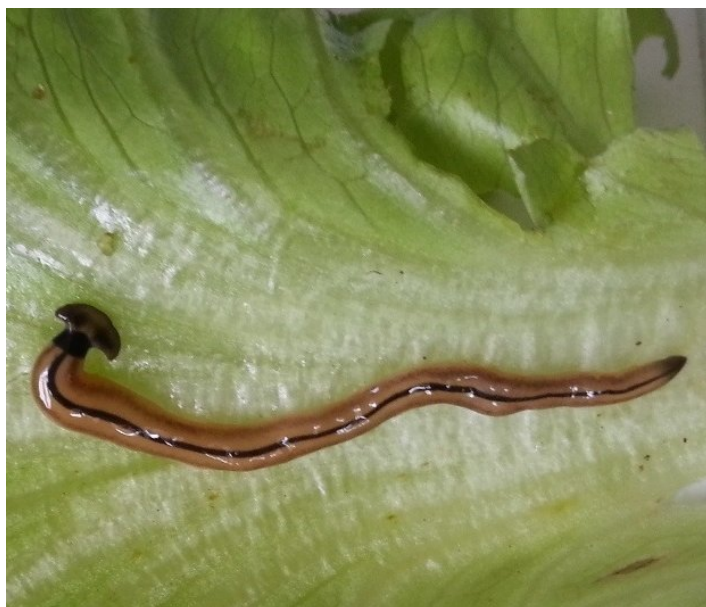

| #   | Date       | Locality     | Department / State | Country - Continent | Origin            |
|-----|------------|--------------|--------------------|---------------------|-------------------|
| V28 | 06/03/2016 | Sainte Marie | La Réunion         | La Réunion - Africa | Fontaine, Romuald |

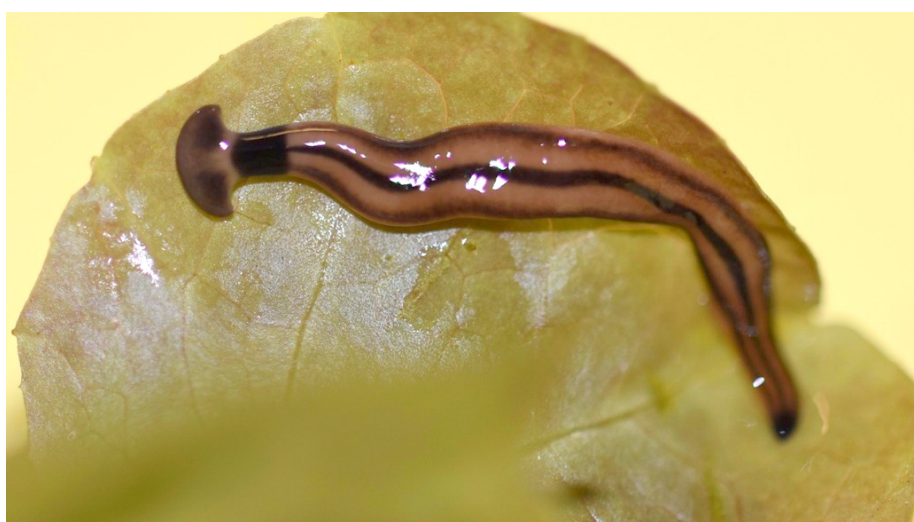

## *Bipalium vagum* V29

| #   | Date       | Locality | Department / State | Country - Continent | Origin         |
|-----|------------|----------|--------------------|---------------------|----------------|
| V29 | 12/02/2009 | unknown  | La Réunion         | La Réunion - Africa | Gilson, Michel |

Note: early record (2009).

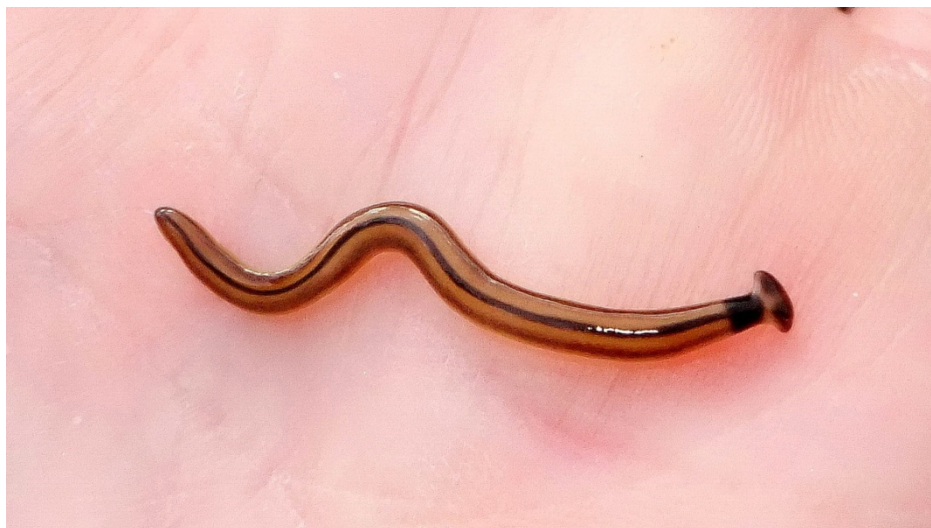

## *Bipalium vagum* V30

| #   | Date       | Locality | Department / State | Country - Continent | Origin         |
|-----|------------|----------|--------------------|---------------------|----------------|
| V30 | 03/03/2010 | unknown  | La Réunion         | La Réunion - Africa | Gilson, Michel |

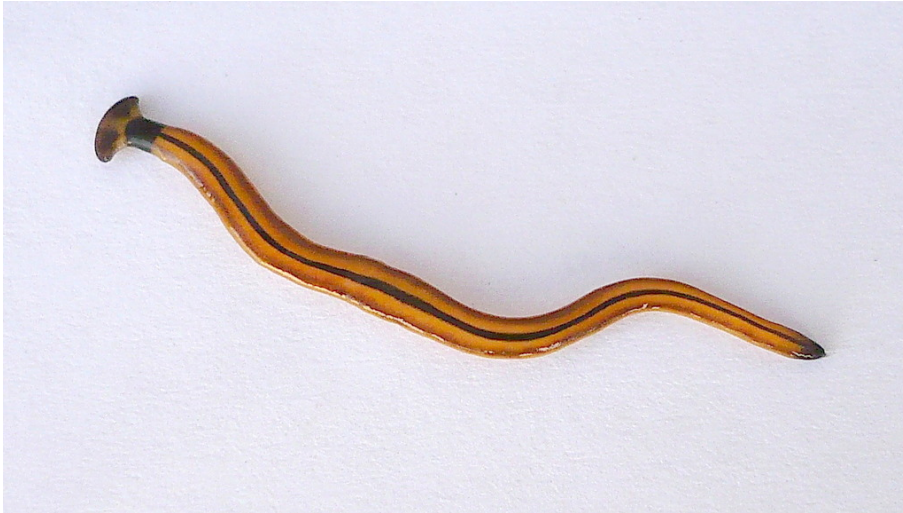

## *Bipalium vagum* V31

| #   | Date       | Locality | Department / State | Country - Continent | Origin             |
|-----|------------|----------|--------------------|---------------------|--------------------|
| V31 | 01/05/2011 | unknown  | La Réunion         | La Réunion - Africa | Martiré, Dominique |

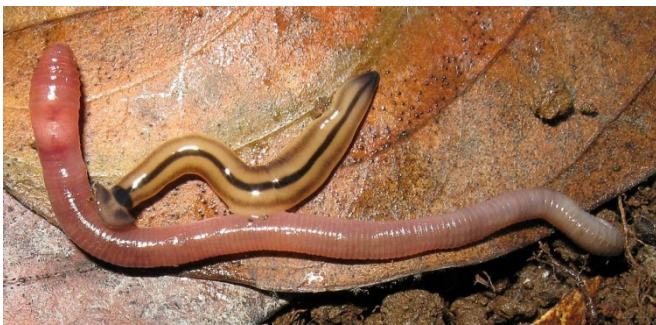

## *Bipalium vagum* V32

| #   | Date       | Locality | Department / State | Country - Continent | Origin             |
|-----|------------|----------|--------------------|---------------------|--------------------|
| V32 | 28/10/2013 | unknown  | La Réunion         | La Réunion - Africa | Martiré, Dominique |

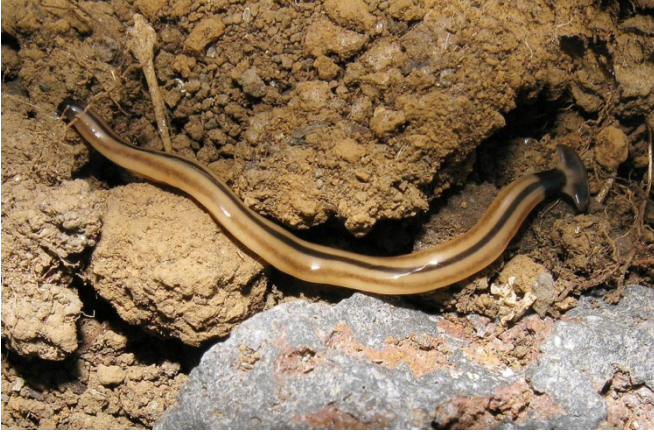

## *Bipalium vagum* V33

| #   | Date       | Locality | Department / State | Country - Continent | Origin         |
|-----|------------|----------|--------------------|---------------------|----------------|
| V33 | 17/08/2015 | unknown  | La Réunion         | La Réunion - Africa | Lacoste, Marie |

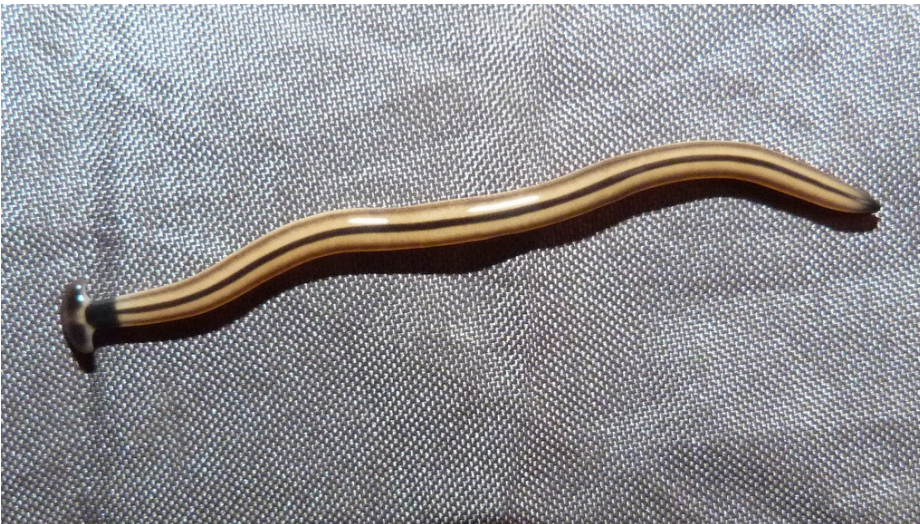

Supplement: Supplement_2_to_article_-photographs_from_citizen_science(WITH_DOI).pdf [file Supplement_2_to_article_-photographs_from_citizen_science(WITH_DOI).pdf]
